# Supplementary material
Source: publisher figshare collection journal article supplement (https://tandf.figshare.com/ndownloader/files/31584476)
Supplement: Supplementary file 1 [file 31584476]

**Multicomponent Synthesis of Pyrimidoquinolinetriones and Pyridodipyrimidines in the Presence of Triethylenediamine-Based Ionic Liquid/MIL-101(Cr) Metal–Organic Framework Composite**

Zohreh Mahmoudi a,b, Mohammad Ali Ghasemzadeh b,*,

Hasan Kabiri-Fard a, Saeed Taghvaei Ganjali a

*aDepartment of Chemistry, North Tehran Branch, Islamic Azad Univer**sity, Tehran, I. R. Iran*

*Post* *Box: 1913674711, I. R. Iran.*

*bDepart**ment of Chemistry, Qom Branch, Islamic Azad University, Qom, I. R. Iran*

*Post Box: 37491-13191,* *I. R. Iran.*

*Corresponding author E-mail address:* [*Ghasemzadeh@qom-iau.ac.ir*](mailto:Ghasemzadeh@qom-iau.ac.ir)*; Tel/Fax.: +98-253-7780001*

**Spectral Data of New Compounds**

**5-(2-hydroxy-5-nitrophenyl)-8-thioxo-5,8,9,10-tetrahydropyrido[2,3-d:6,5-d'] dipyrimidine-2,4,6(1H,3H,7H)-trione (4g):** White solid; Yield: 90%; mp: >300 °C; IR (KBr, cm-1): 3401, 3217, 1724, 1647, 1524, 1476, 1355; 1H NMR (400 MHz, DMSO‑*d*6): 4.90 (s, 1H, CH), 6.58 (s, 1H, OH), 7.2 (s, 1H, NH), 7.22 (s, 1H, NH), 7. 9 (s, 1H, ArH), 8.03 (d, 1H, Ar-H), 8.05 (d, 1H, Ar-H), 10.04 (s, 1H, 1NH), 10.69 (s, 1H, 1NH), 11.90 (s, 1H, 1NH); 13C NMR (100 MHz, DMSO‑*d*6): 163.60, 163.27, 154.42, 149.11, 150.55, 149.94, 144.25, 126.87, 124.64, 123.10, 117.09, 89.73, 86.74, 27.15; Anal. Calcd. For C15H10N6O6S: C, 44.78; H, 2.51; N, 20.89; O, 23.86; S, 7.97. Found: C, 44.81; H, 2.45; N, 20.91; O, 23.78; S, 7.93.


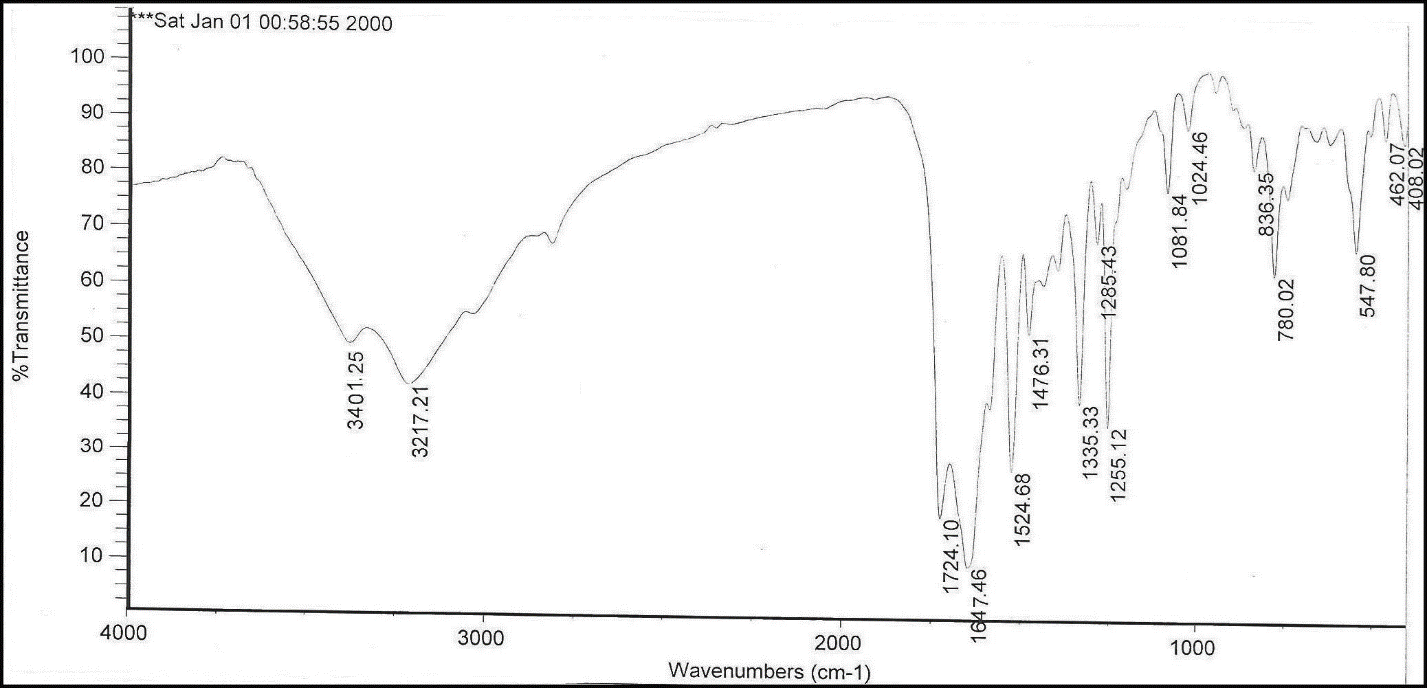


**Figure S1:** FT-IR spectrum of 4g

***
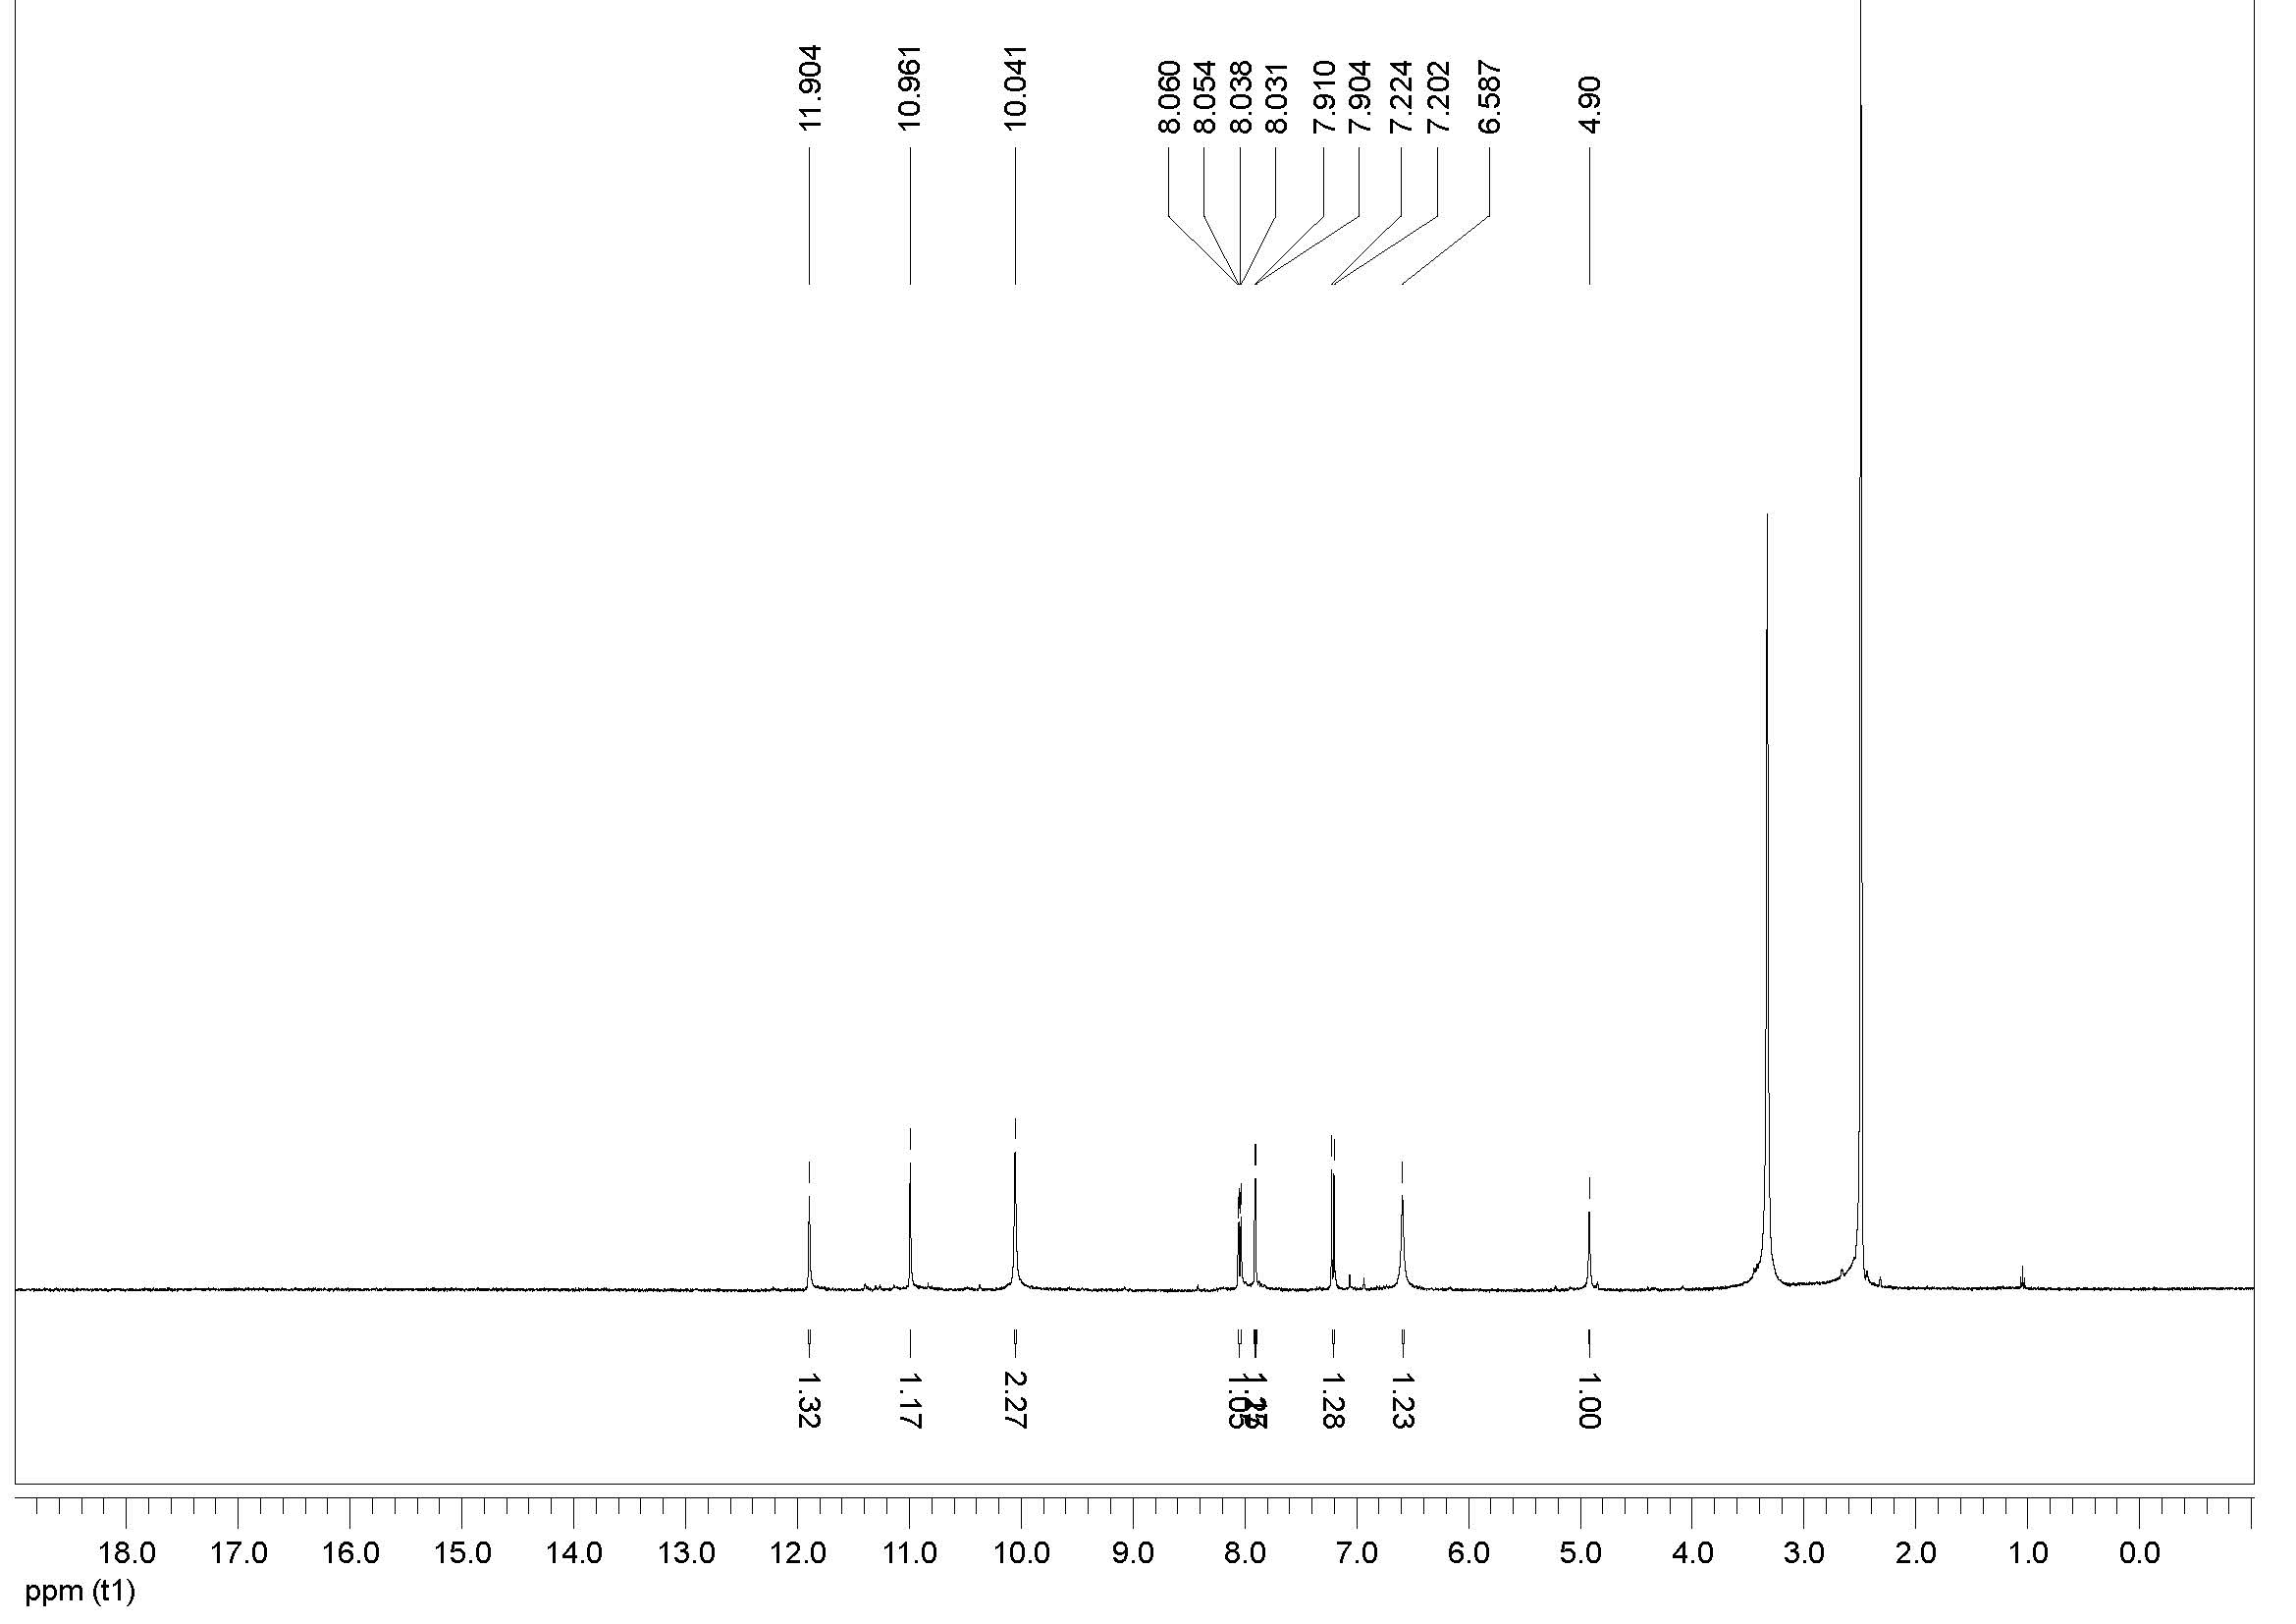
***

**Figure S2:** 1H-NMR spectrum of 4g

***
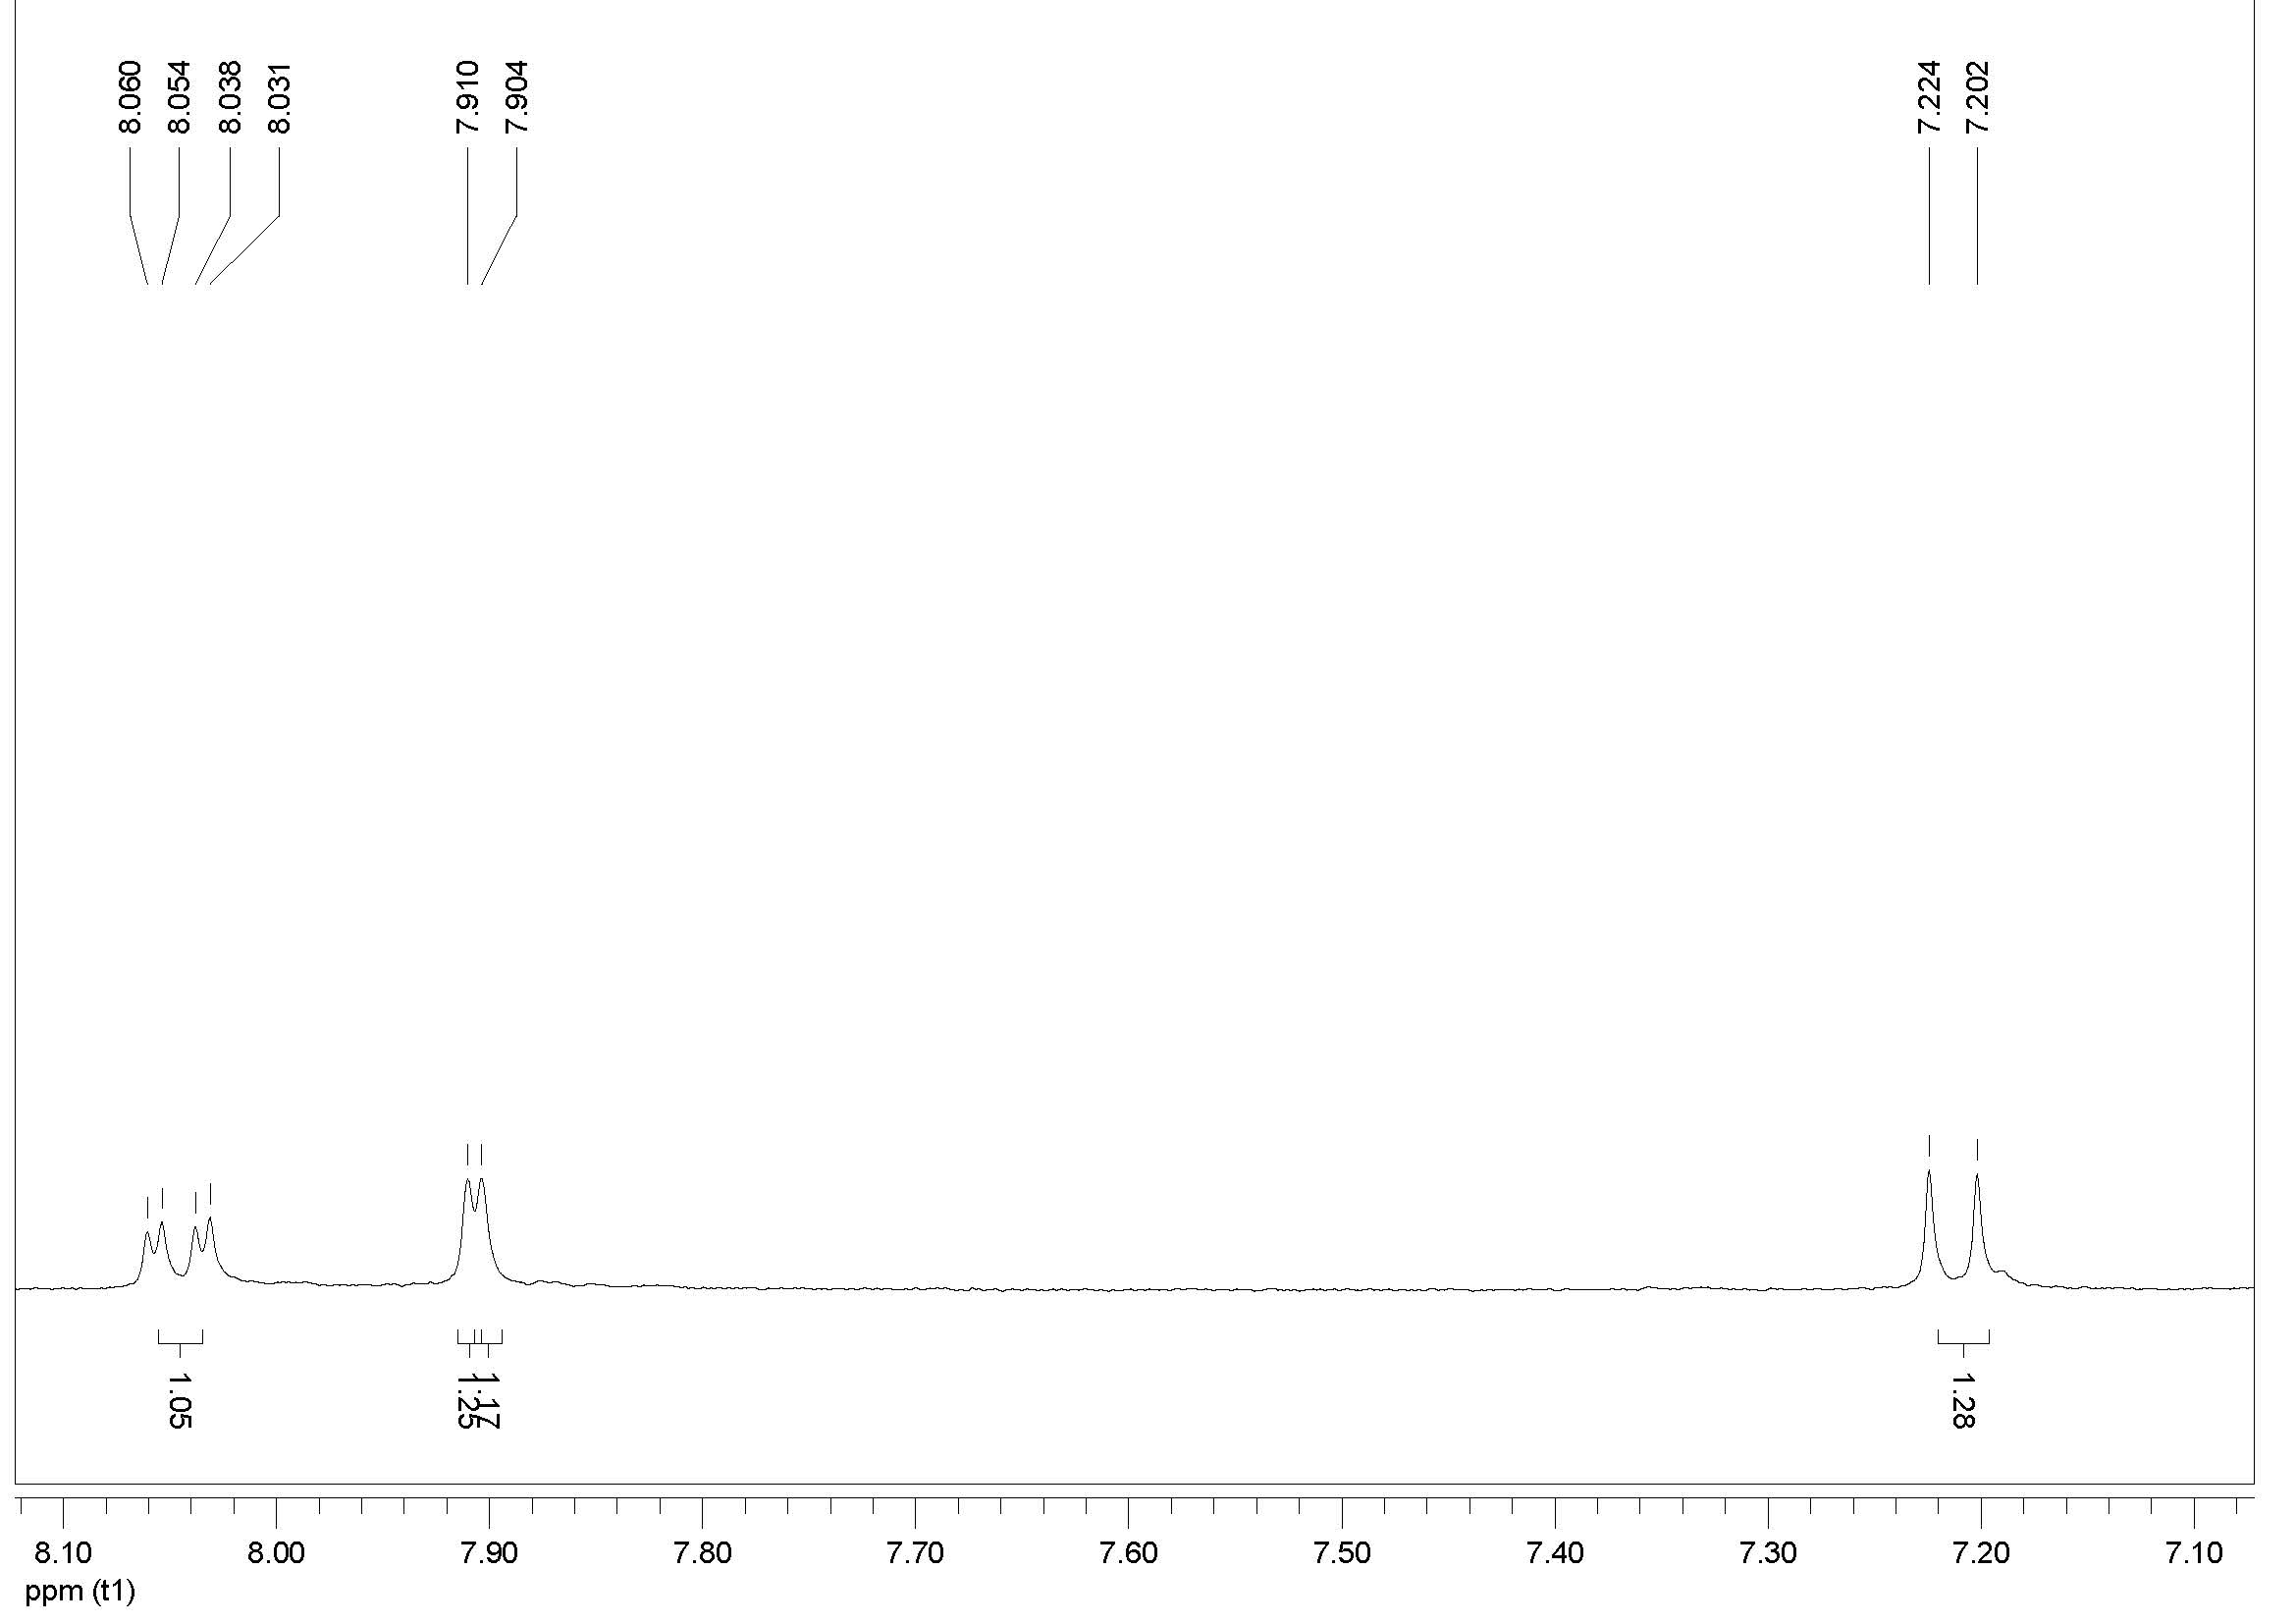
***

**Figure S3:** The expand 1H-NMR spectrum of 4g

***
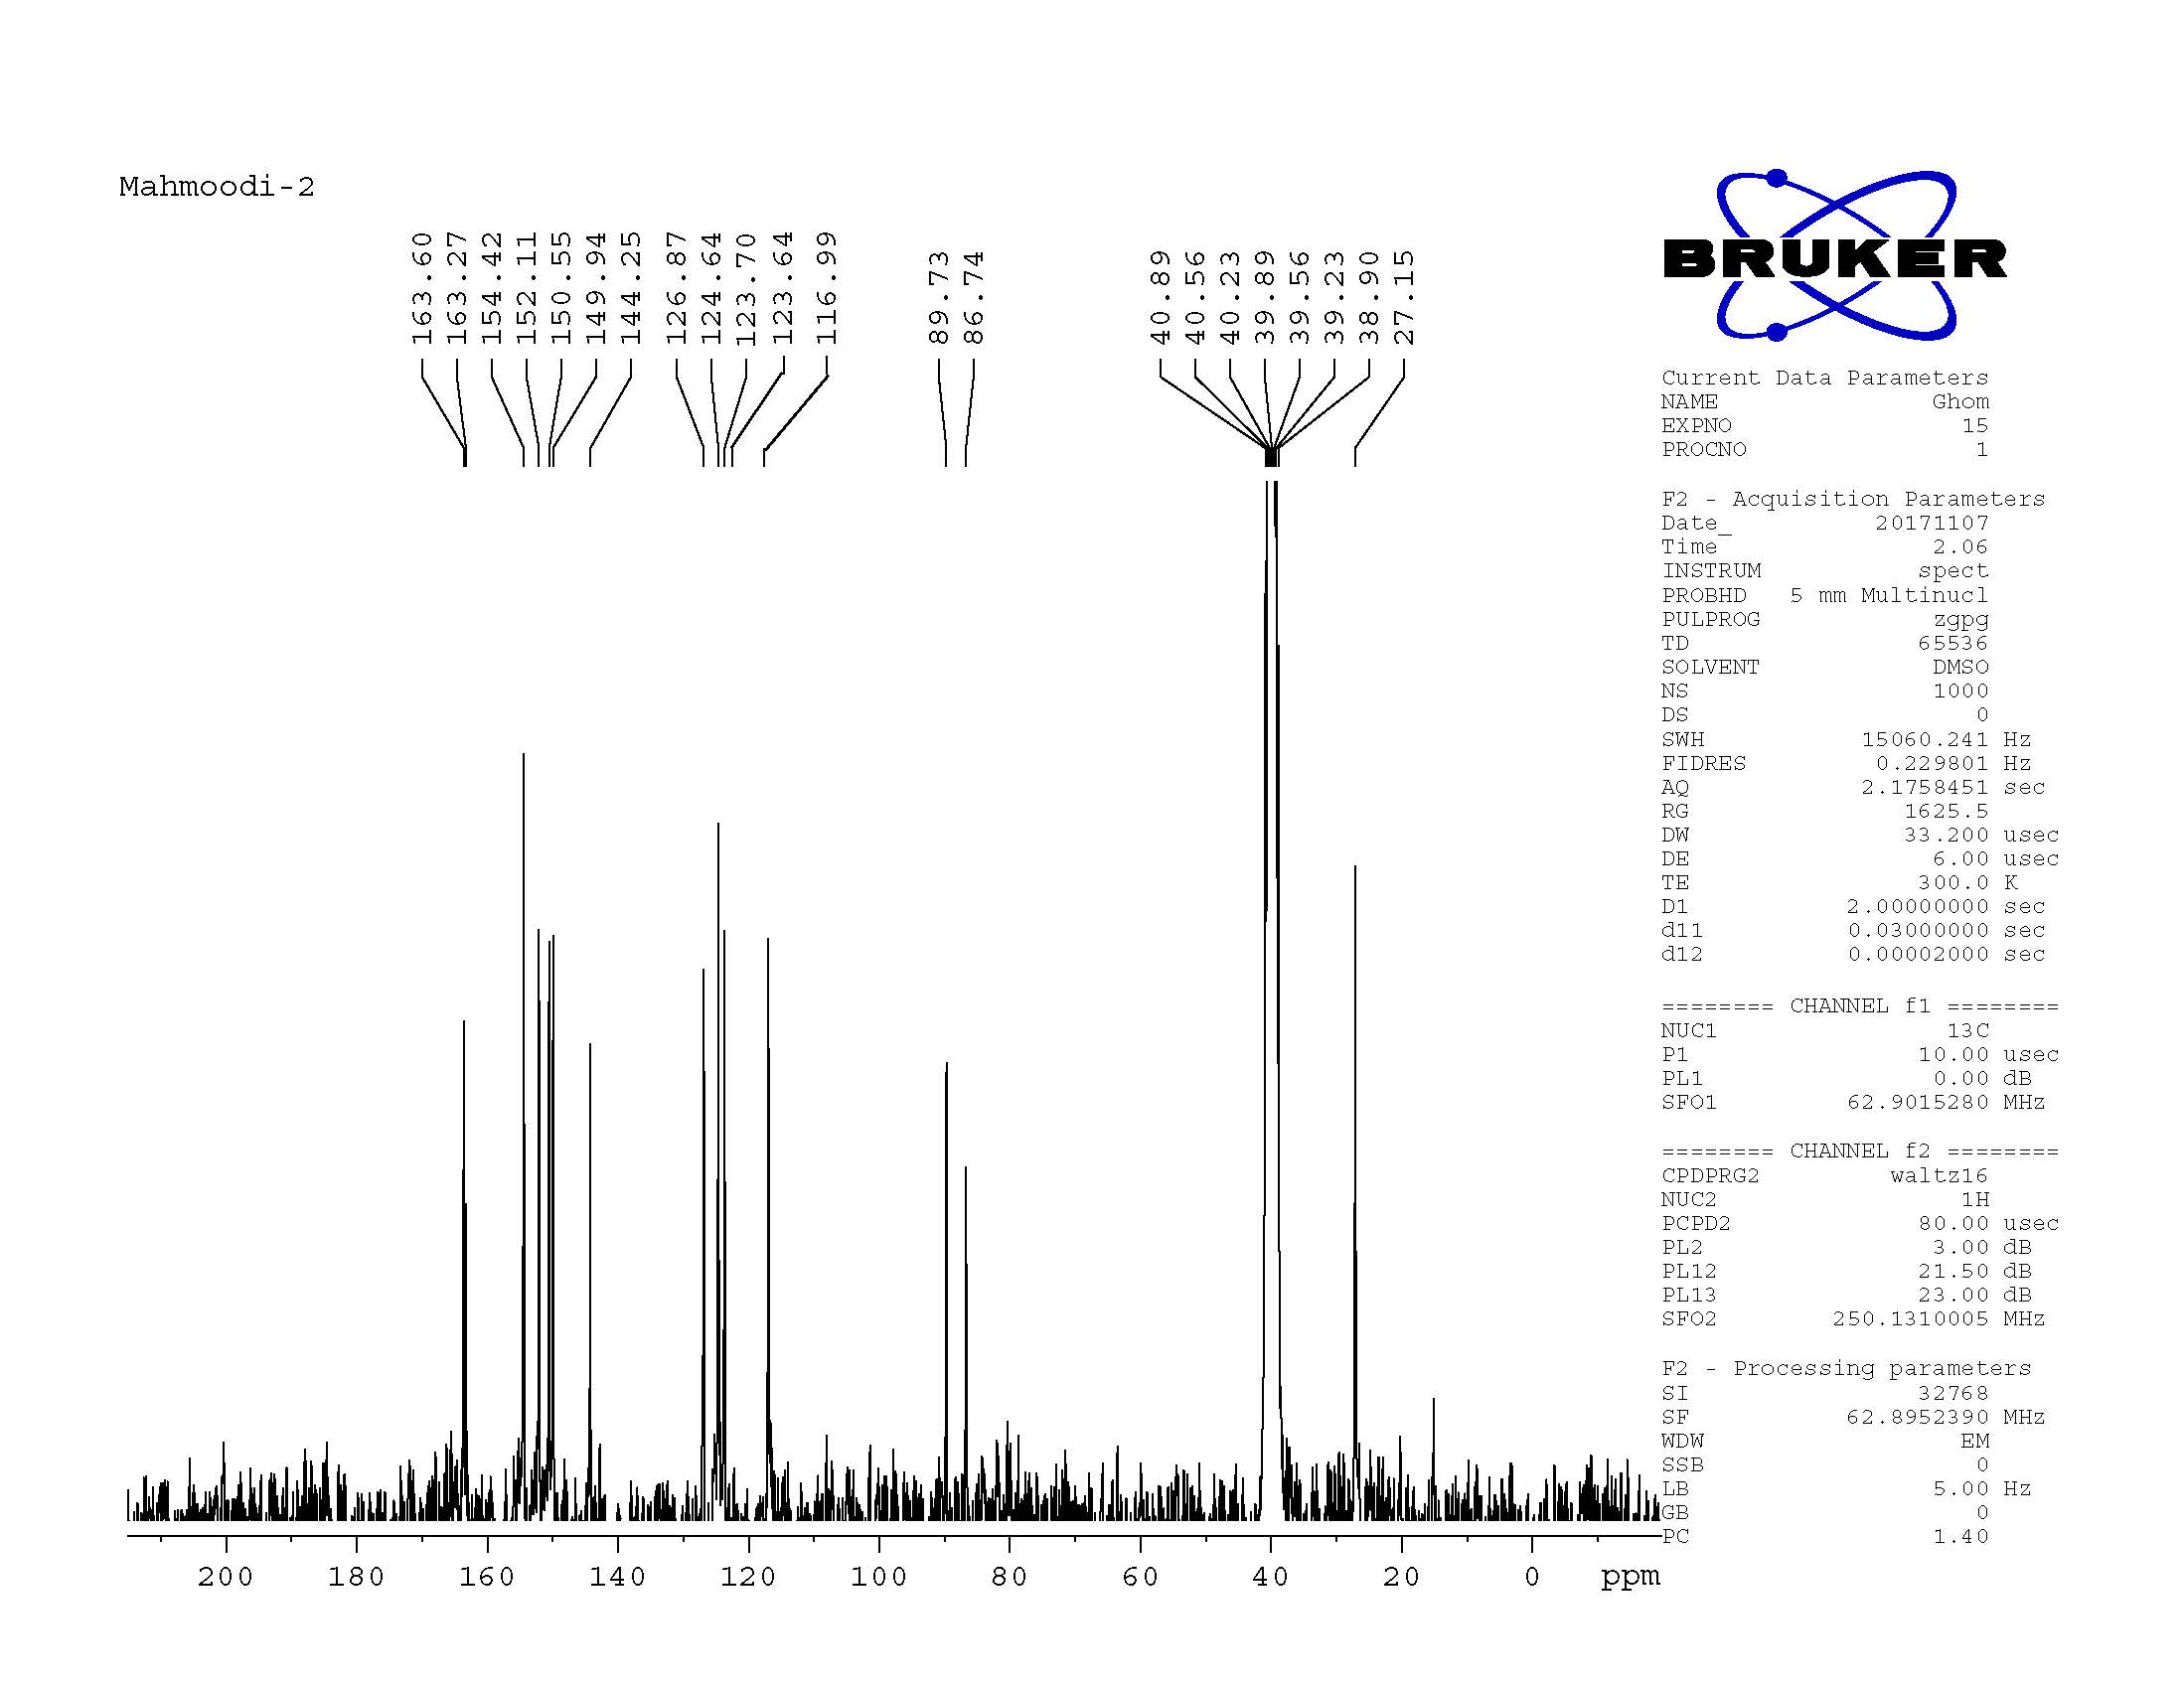
***

**Figure S4:** 13C-NMR spectrum of 4g

**4-(8,8-Dimethyl-2,4,6-trioxo-10-(p-tolyl)-1,2,3,4,5,6,7,8,9,10-decahydropyrimido[4,5-b]quinolin-5-yl) benzonitrile (4l):** White solid; Yield: 86%; mp: >300 °C; IR (KBr, cm-1): 3378, 3204,1706, 1630, 1524, 1349; 1H NMR (400 MHz, DMSO‑*d*6): 3.53 (s, 6H, 2CH3), 5.48 (s, 1H, CH), 6.90 (s, 1H, NH), 7. 5 (t, J = 8 Hz, 2H, Ar-H), 7.71 (s, 1H, Ar-H), 8.01 (d, J = 8 Hz, 1H, Ar-H), 11.02 (s, 1H, 1NH), 11.29 (s, 1H, 1NH); 13C NMR (100 MHz, DMSO‑*d*6): 167.22, 165.82, 156.54, 151.29, 149.61, 148.22, 142.84, 134.47, 129.87, 121.40, 91.13, 86.74, 33.57, 28.68; Anal. Calcd. For C17H14ClN5O4: C, 52.66; H, 3.64; Cl, 9.14; N, 18.06; O, 16.50. Found: C, 52.70; H, 3.63; Cl, 9.17; N, 18.15; O, 16.53.


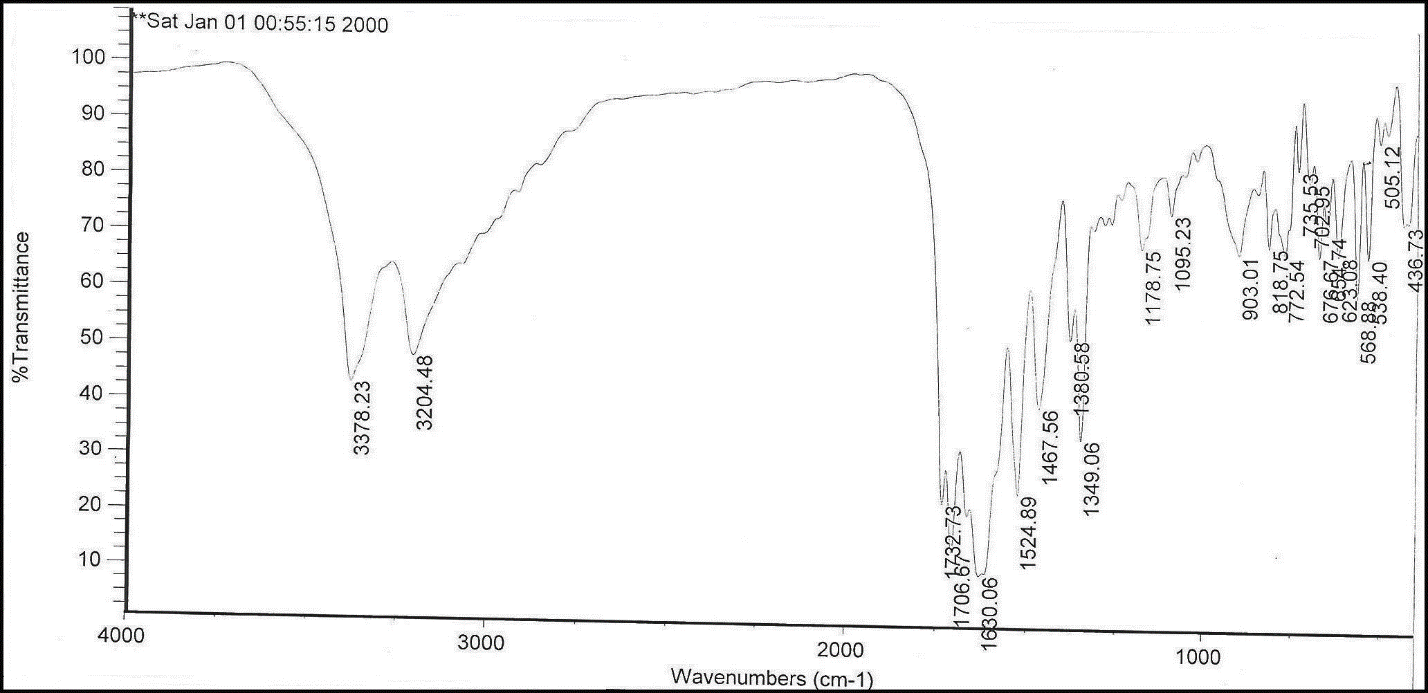


**Figure S5:** FT-IR spectrum of 4l

***
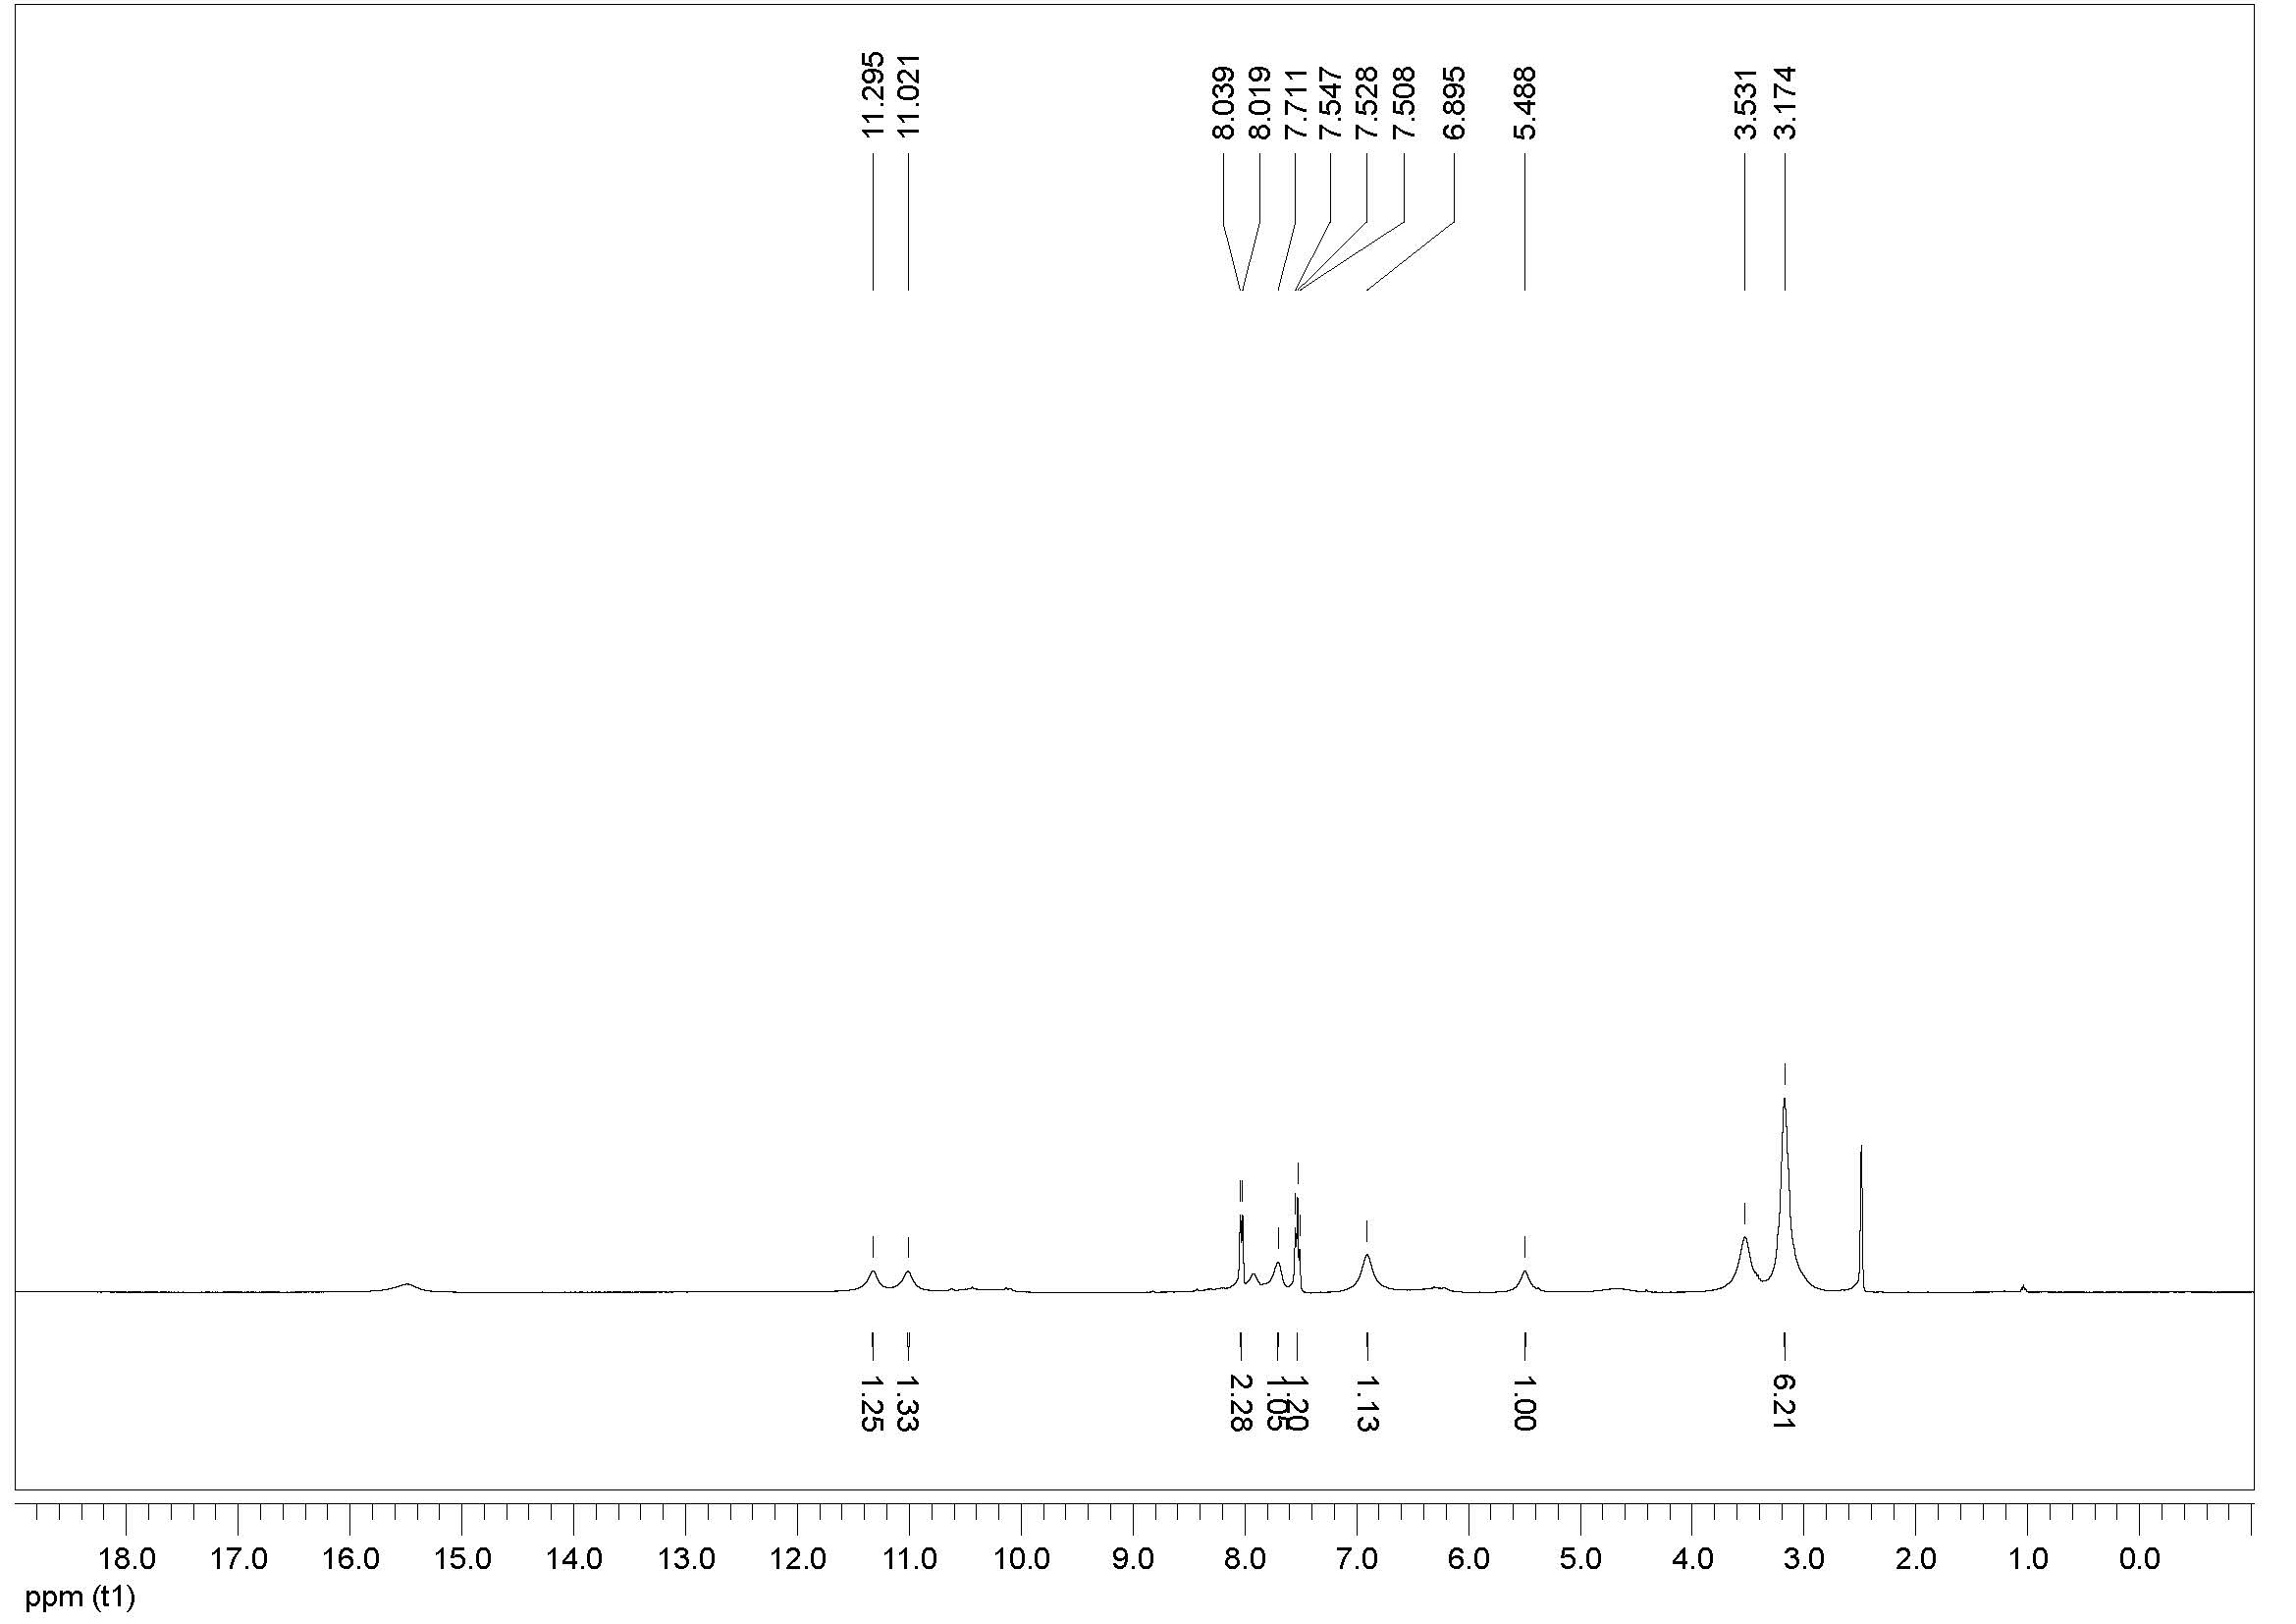
***

**Figure S6:** 1H-NMR spectrum of 4l

***
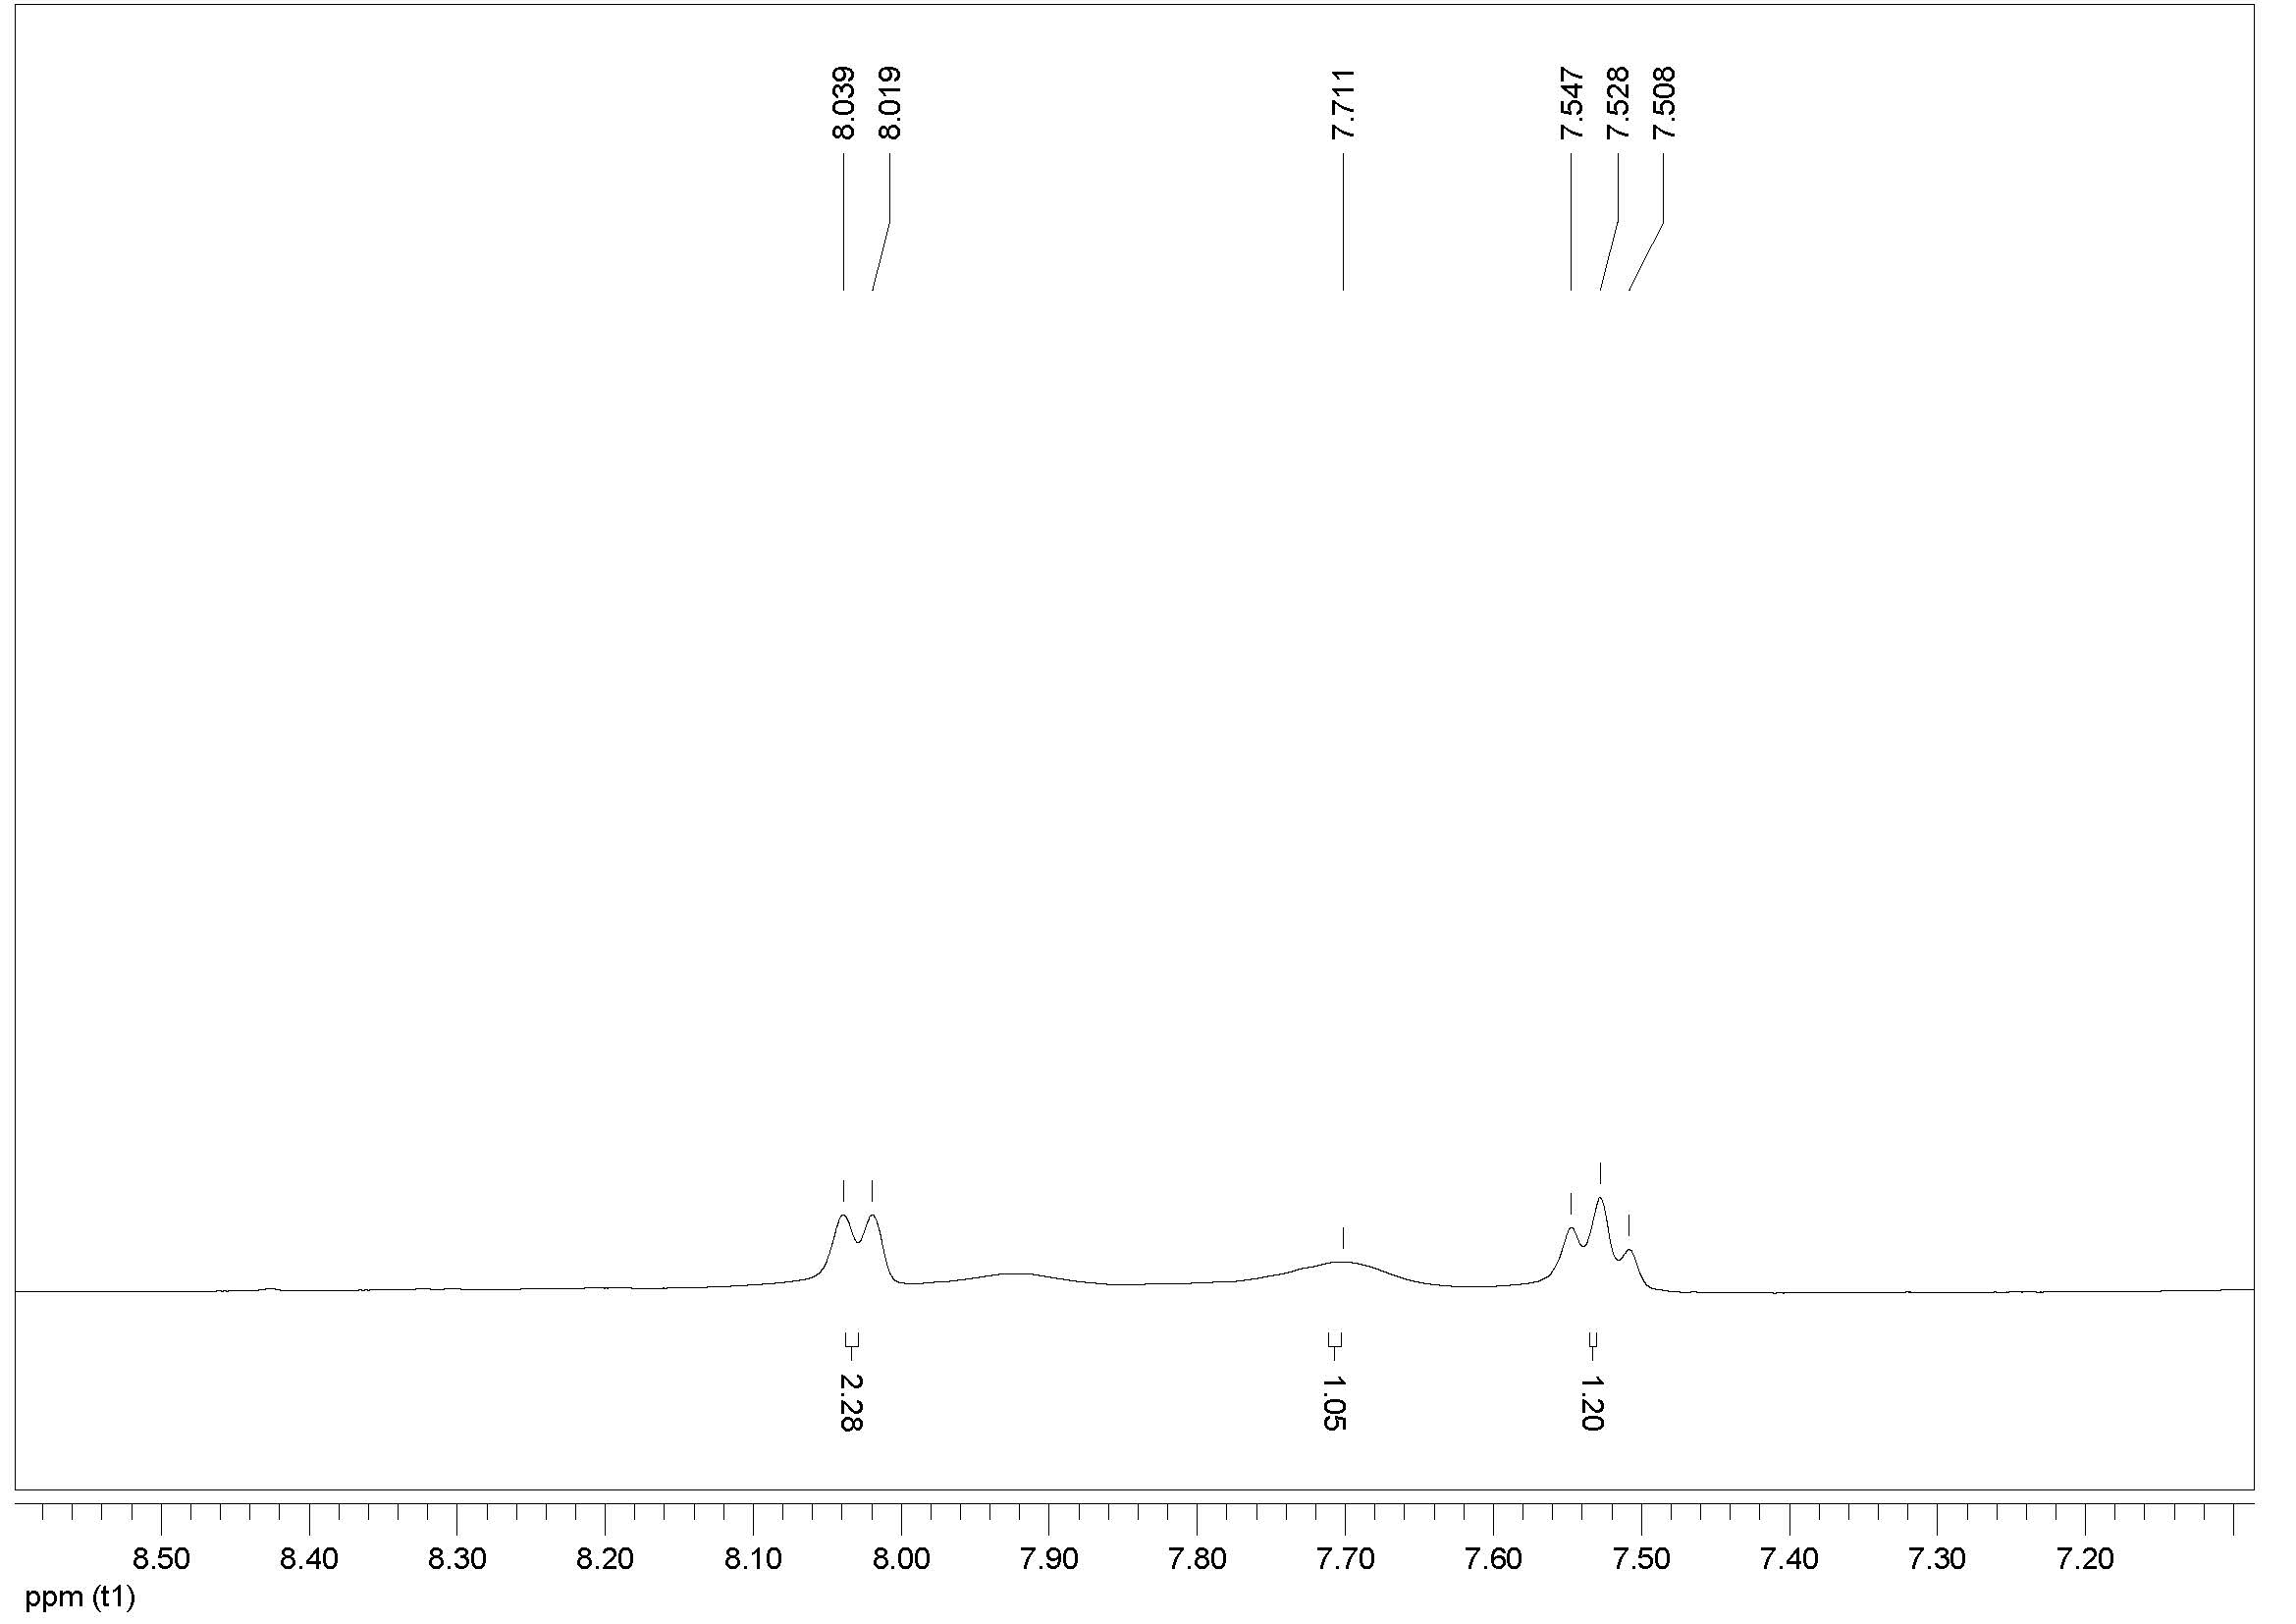
***

**Figure S7:** The expand 1H-NMR spectrum of 4l

**
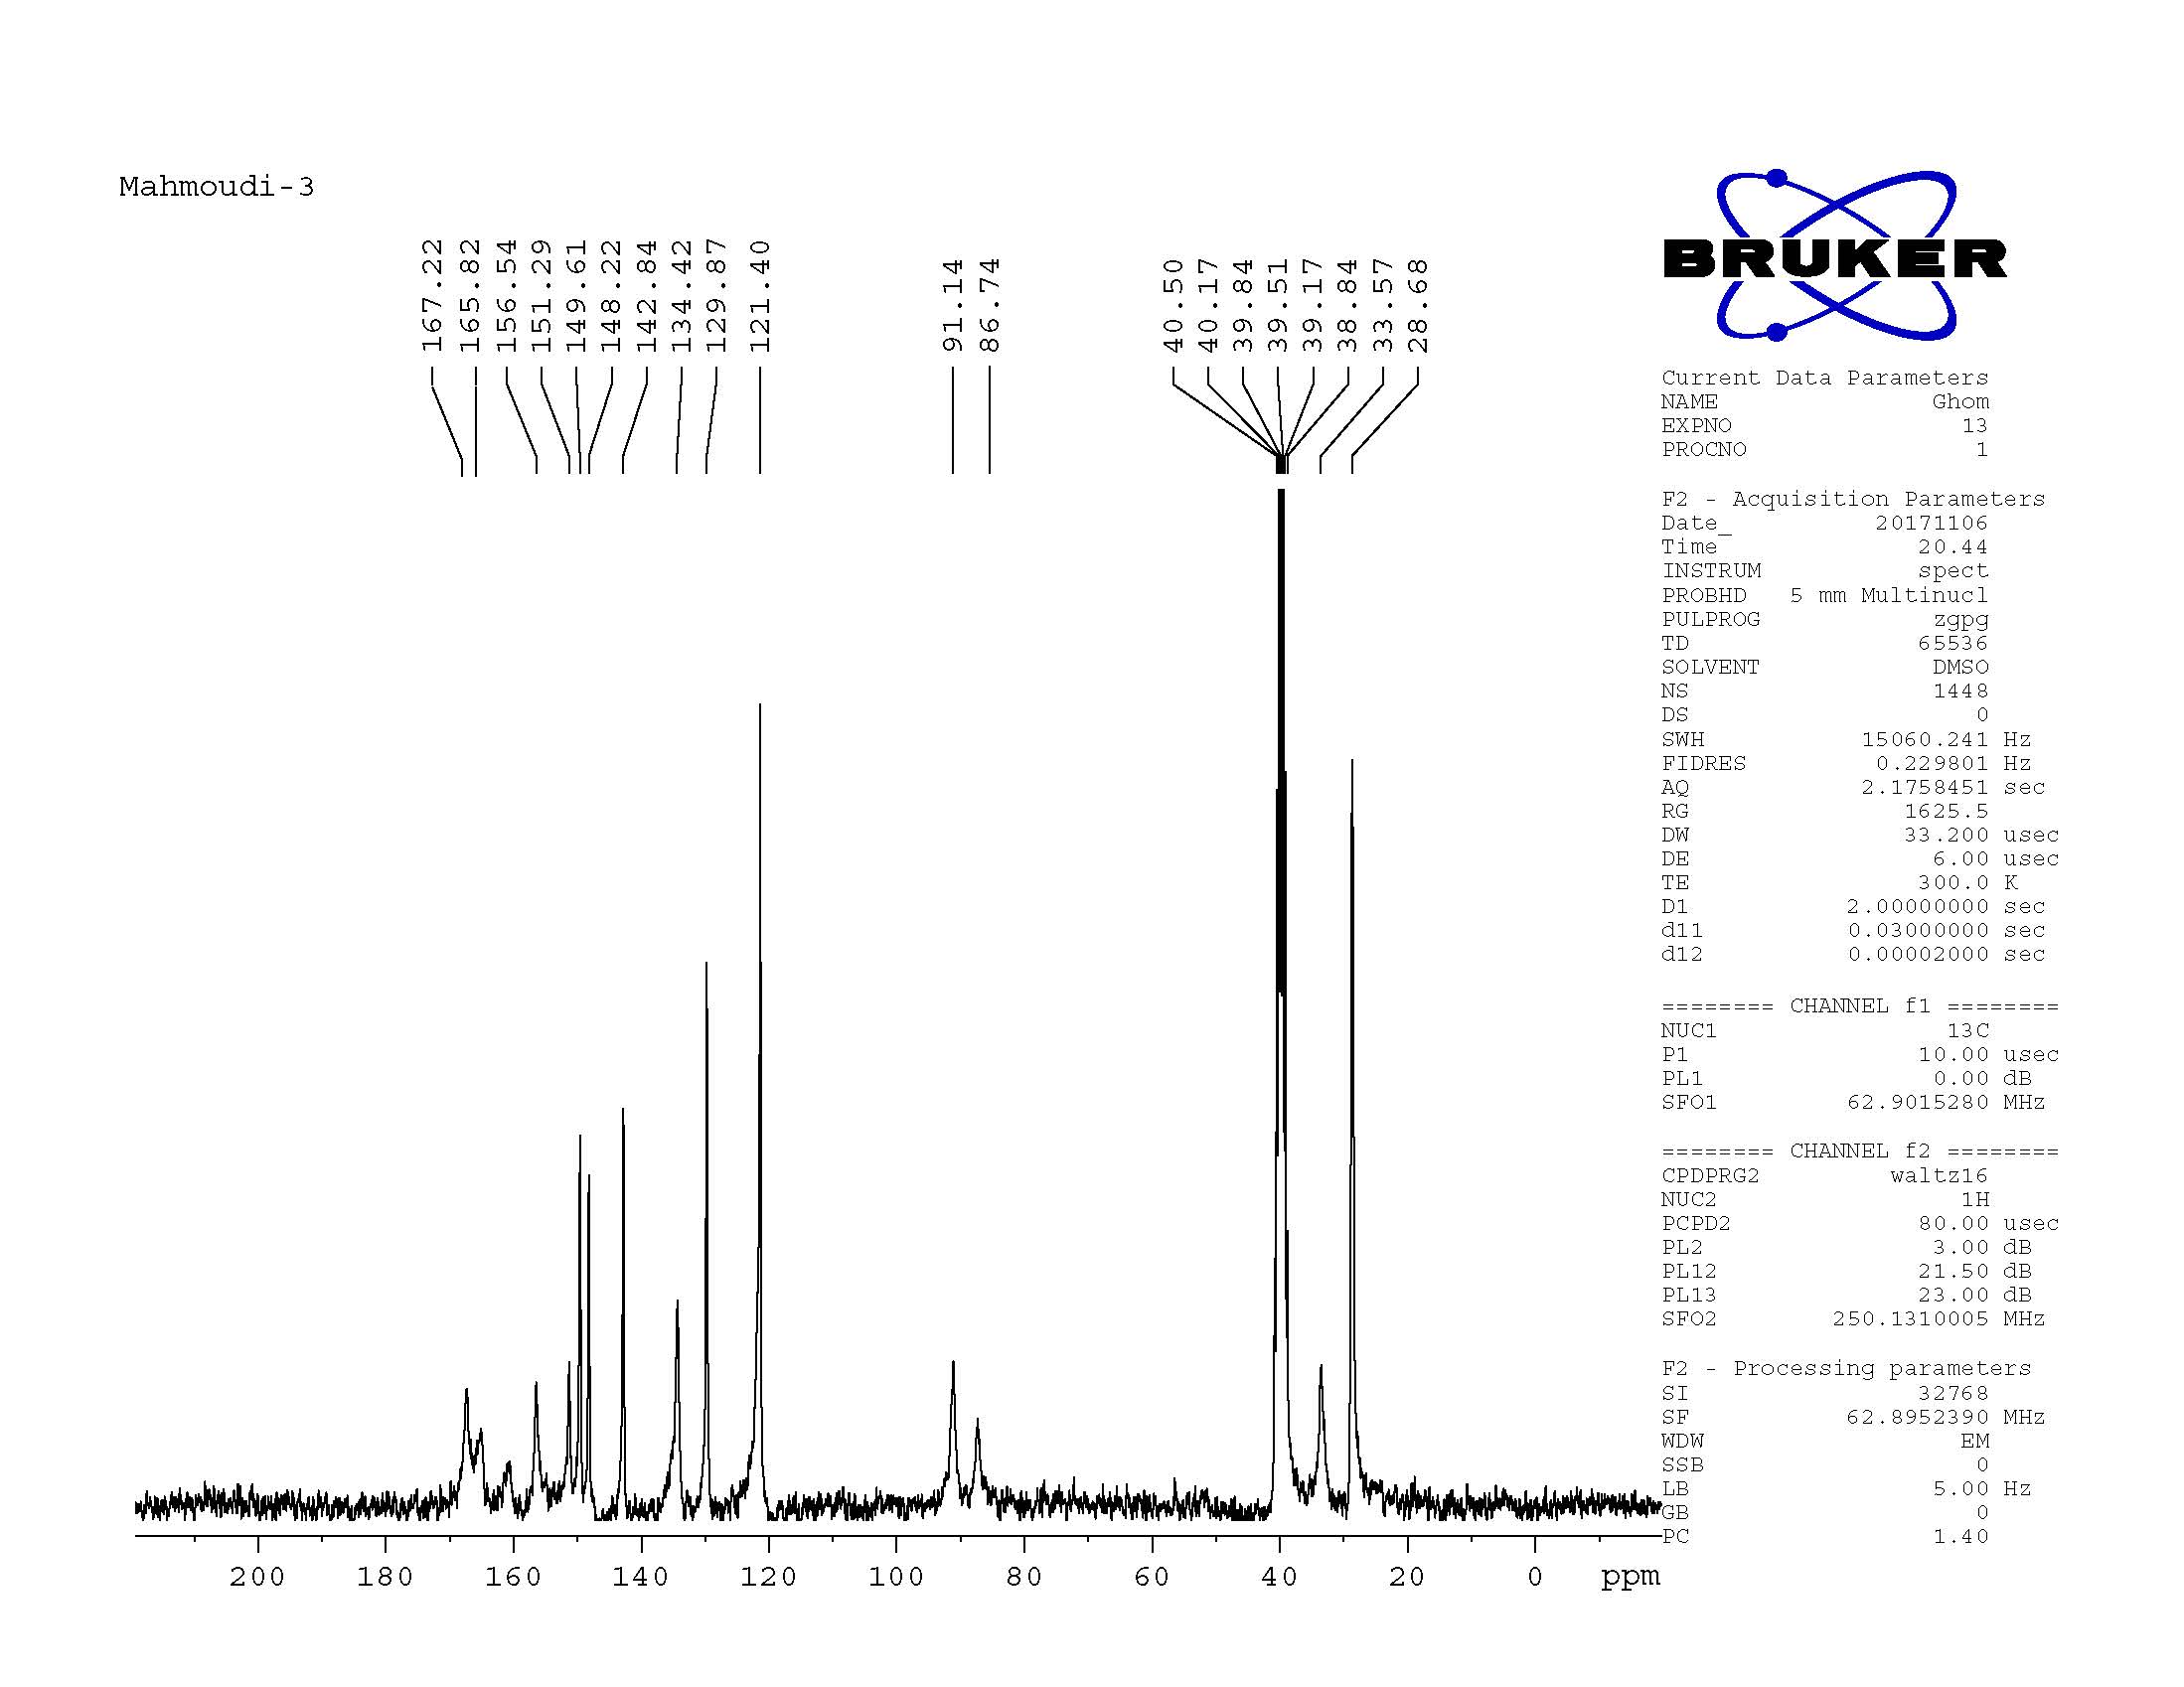
**

**Figure S8:** 13C-NMR spectrum of 4l.

**4-(8,8-Dimethyl-2,4,6-trioxo-10-(p-tolyl)-1,2,3,4,5,6,7,8,9,10-decahydropyrimido[4,5-b]quinolin-5-yl)benzonitrile (5i):** White solid; Yield: 90%; IR (KBr, cm-1): 3363, 2222, 1702, 1592, 1514, 1371, 1150, 791, 552.; 1H NMR (400 MHz, DMSO-*d6*): 10.13 (s, 2H, 2NH), 7.58 (d, 2H, J = 8 Hz, Ar-H), 7.14 (d, 4H, J = 8 Hz, Ar-H), 7.00 (d, 2H, J = 8 Hz, Ar-H), 6.00 (s, 1H, CH), 2.25 (s, 3H, CH3), 2.22 (s, 4H, 2CH2), 1.00 (s, 6H, 2CH3). 13C NMR (100 MHz, DMSO-*d6*) δ(ppm): 195.29, 165.29, 157.18, 152.30, 151.06, 133.92, 131.78, 130.34, 128.23, 121.01, 120.33, 119.84, 107.56, 91.02, 47.77, 31.80, 28.50, 20.82. Anal. Calcd for C27H24N4O3 (452.50): C, 71.67; H, 5.35; N, 12.38; found: C, 71.44; H, 5.17; N, 12.56.

**
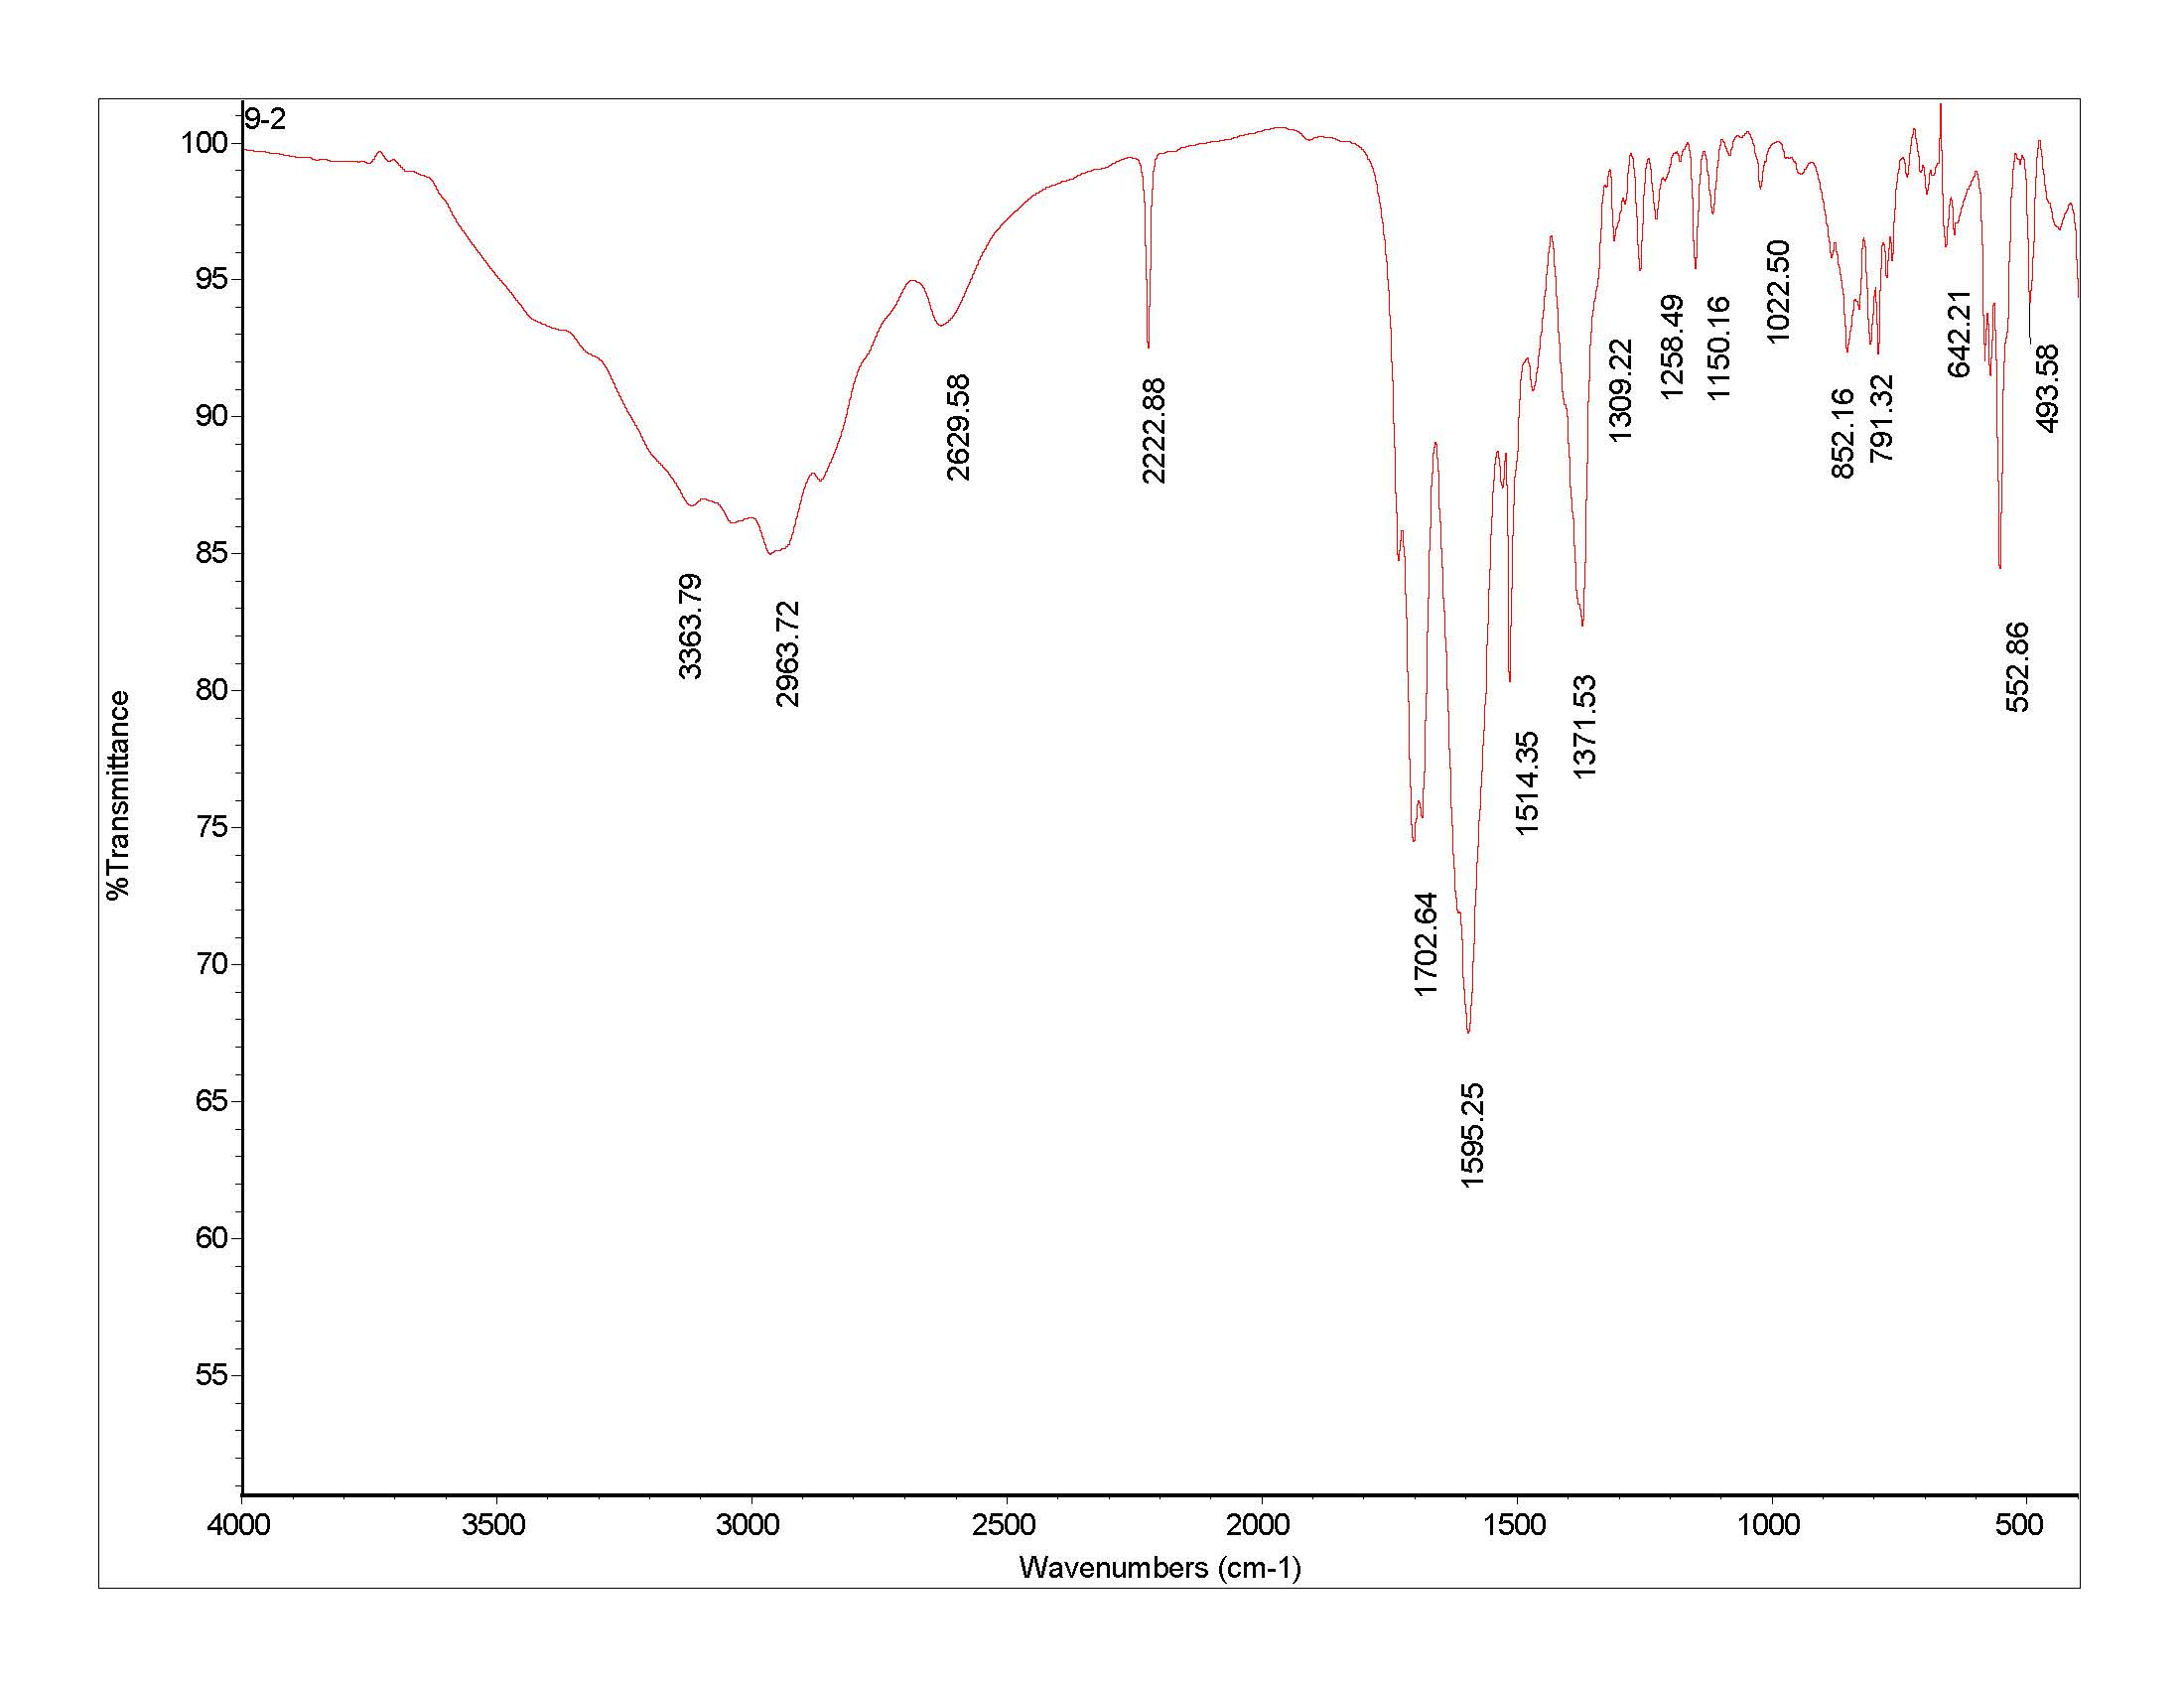
**

**Figure S9:** FT-IR spectrum of 5i

**Figure S10:** 1H-NMR spectrum of 5i.

**Figure S11:** 1 The expand 1H-NMR spectrum of 5i.

**Figure S12:** The expand 1H-NMR spectrum of 5i.

***
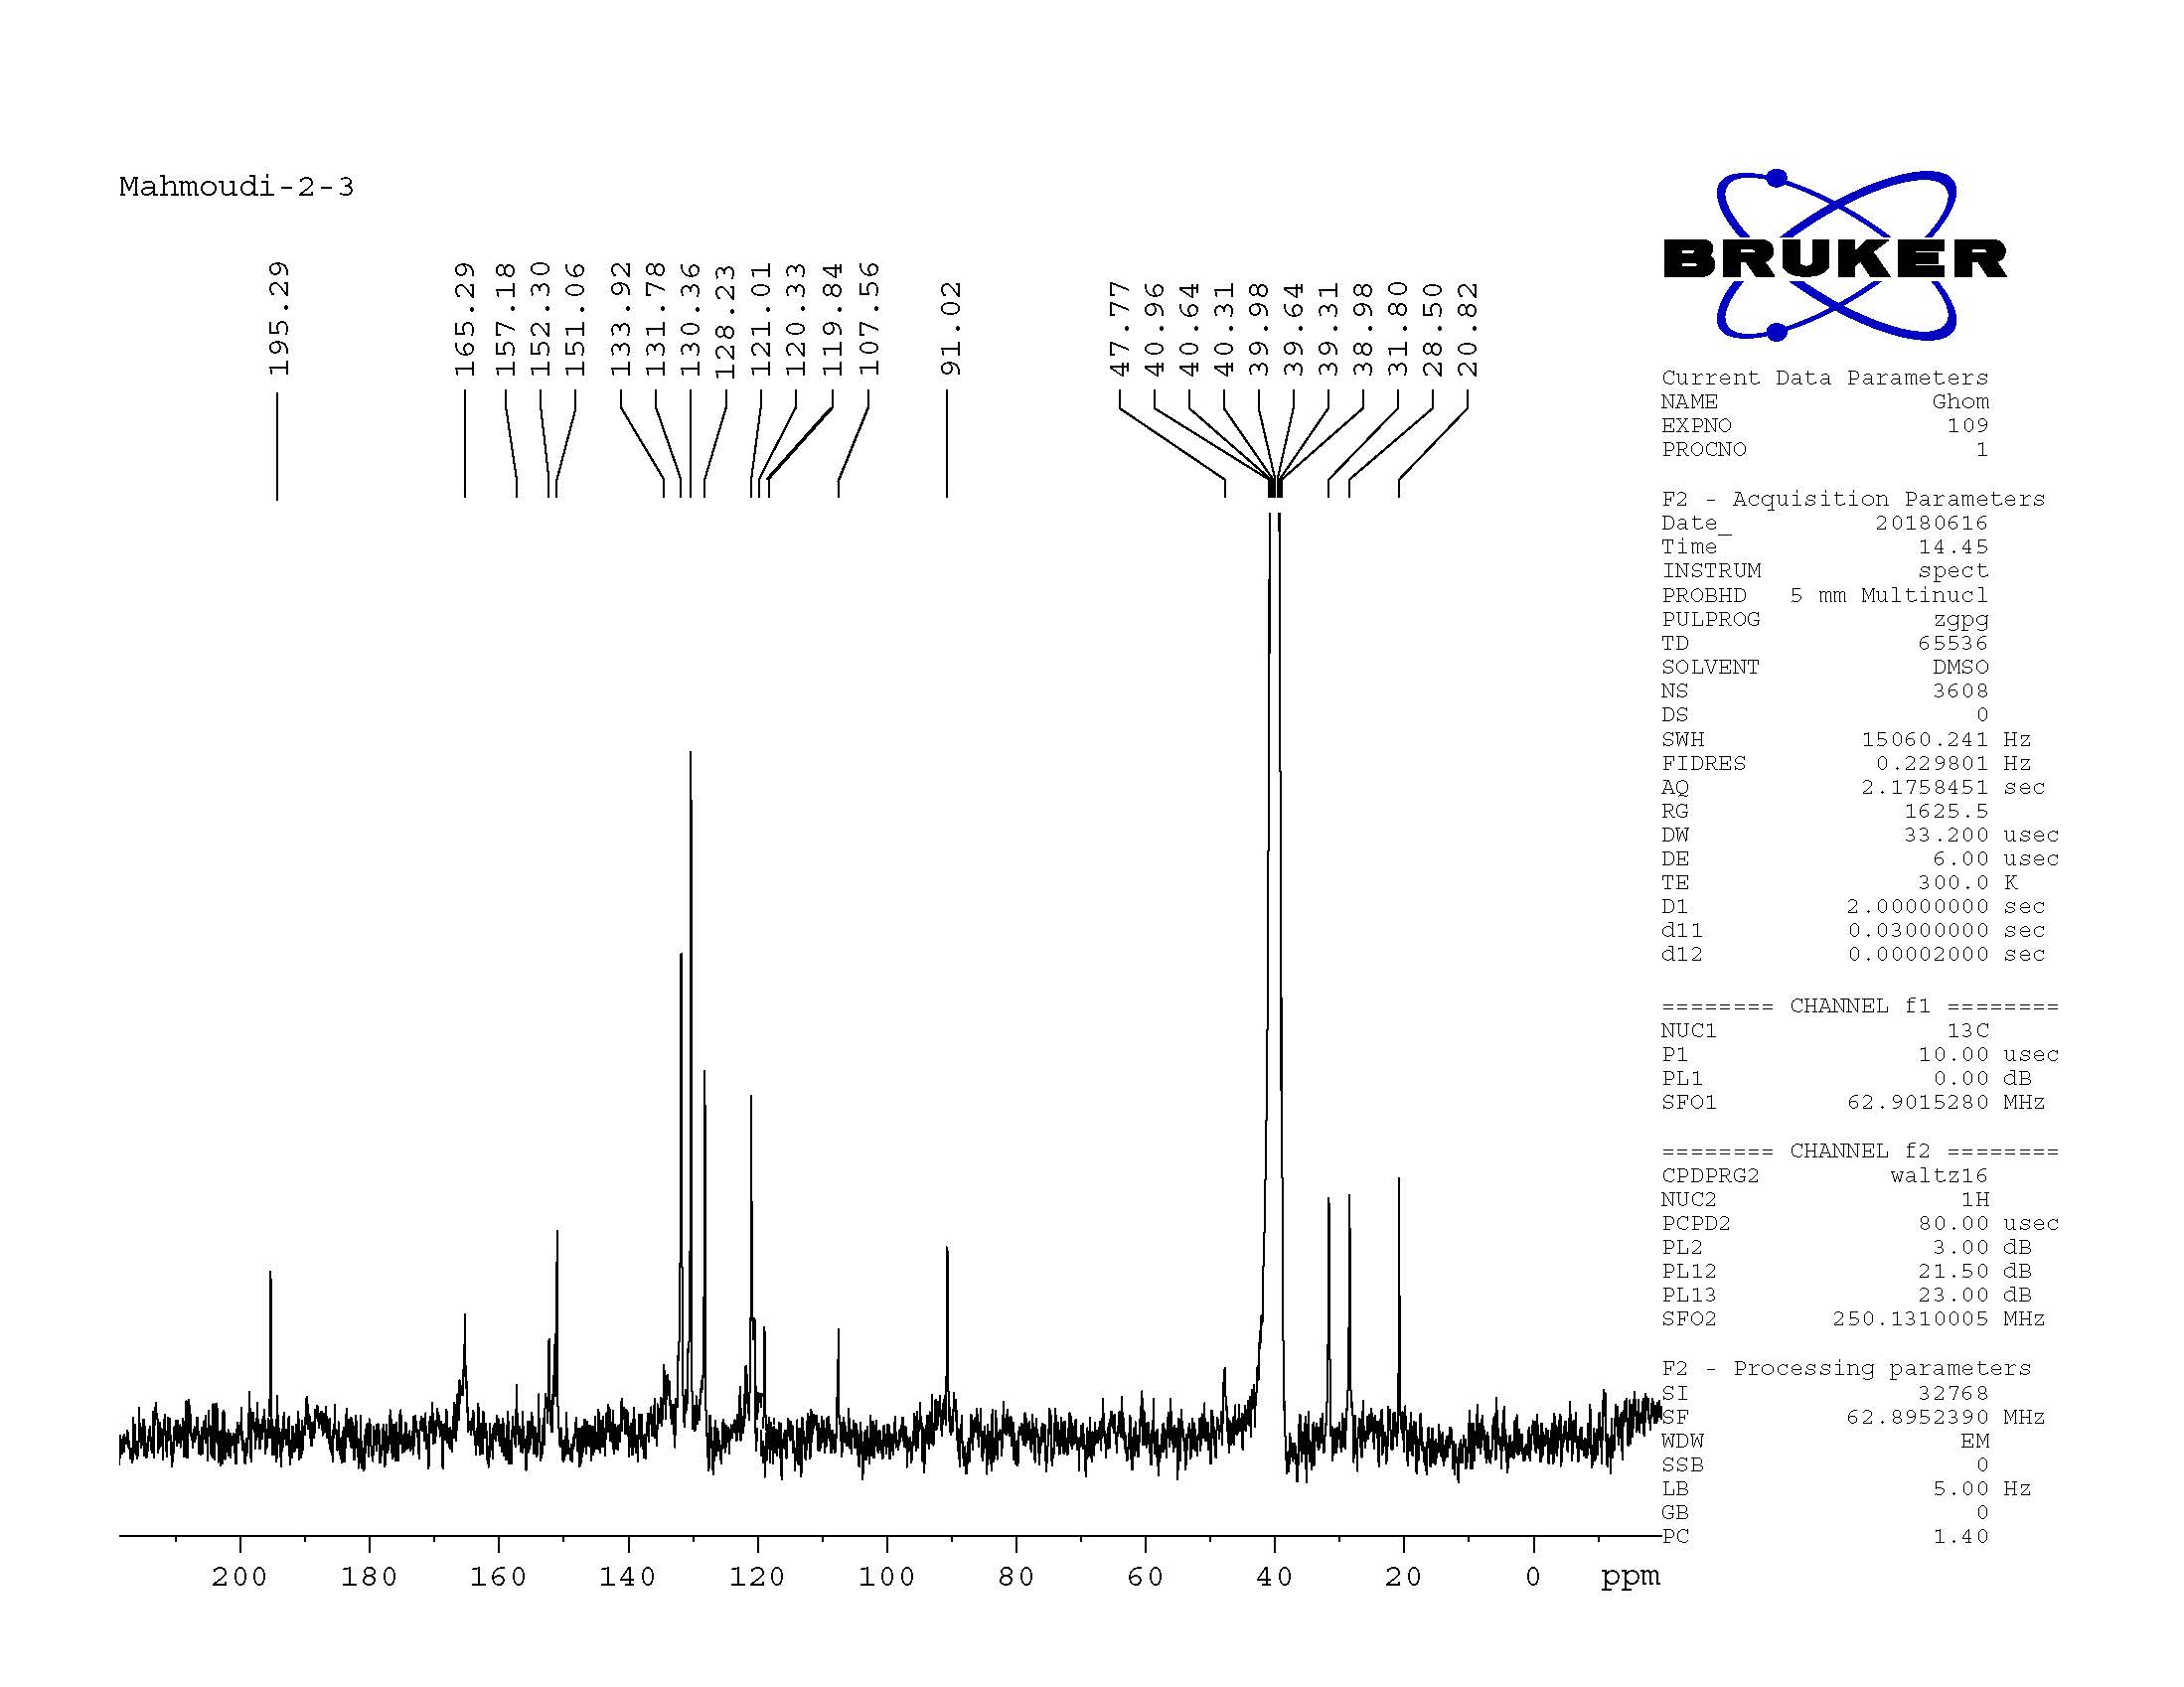
***

**Figure S13:** 13C-NMR spectrum of 5i.

**5-(4-Chlorophenyl)-8,8-dimethyl-10-(p-tolyl)-8,9-dihydropyrimido[4,5-b]quinoline-2,4,6(1H,3H,5H,7H,10H)-trione (5j):** White solid; Yield: 91%; IR (KBr, cm-1): 3414, 2954, 1695, 1598, 1373, 1170, 814, 541.; 1H NMR (400 MHz, DMSO-*d*6): 9.86 (s, 2H, 2NH), 7.17 (d, 2H, *J* = 7.8 Hz, Ar-H), 7.02 (d, 2H, *J* = 7.6 Hz, Ar-H), 6.98 (d, 2H, *J* = 7.8 Hz, Ar-H), 6.79 (d, 2H, *J* = 7.6 Hz, Ar-H), 5.97 (s, 1H, CH), 2.21, 2.20 (2s, 4H, 2CH2), 1.00 (s, 6H, 2CH3), 0.94 (s, 3H, CH3). 13C NMR (100 MHz, DMSO-*d*6) δ(ppm): 195. 51, 165.24, 158.27, 151.50, 151.08, 148.31, 148.04, 134.34, 129.43, 129.20, 126.66, 123.77, 121.50, 120.21, 115.27, 112.97, 90.69, 55.87, 48.03, 31.83, 31.22, 28.53, 22.33. Aanal. Calcd for: C26H24ClN3O3 (461.94): C, 67.60; H, 5.24; N, 9.10; found: C, 67.87; H, 5.48; N, 9.35.

**
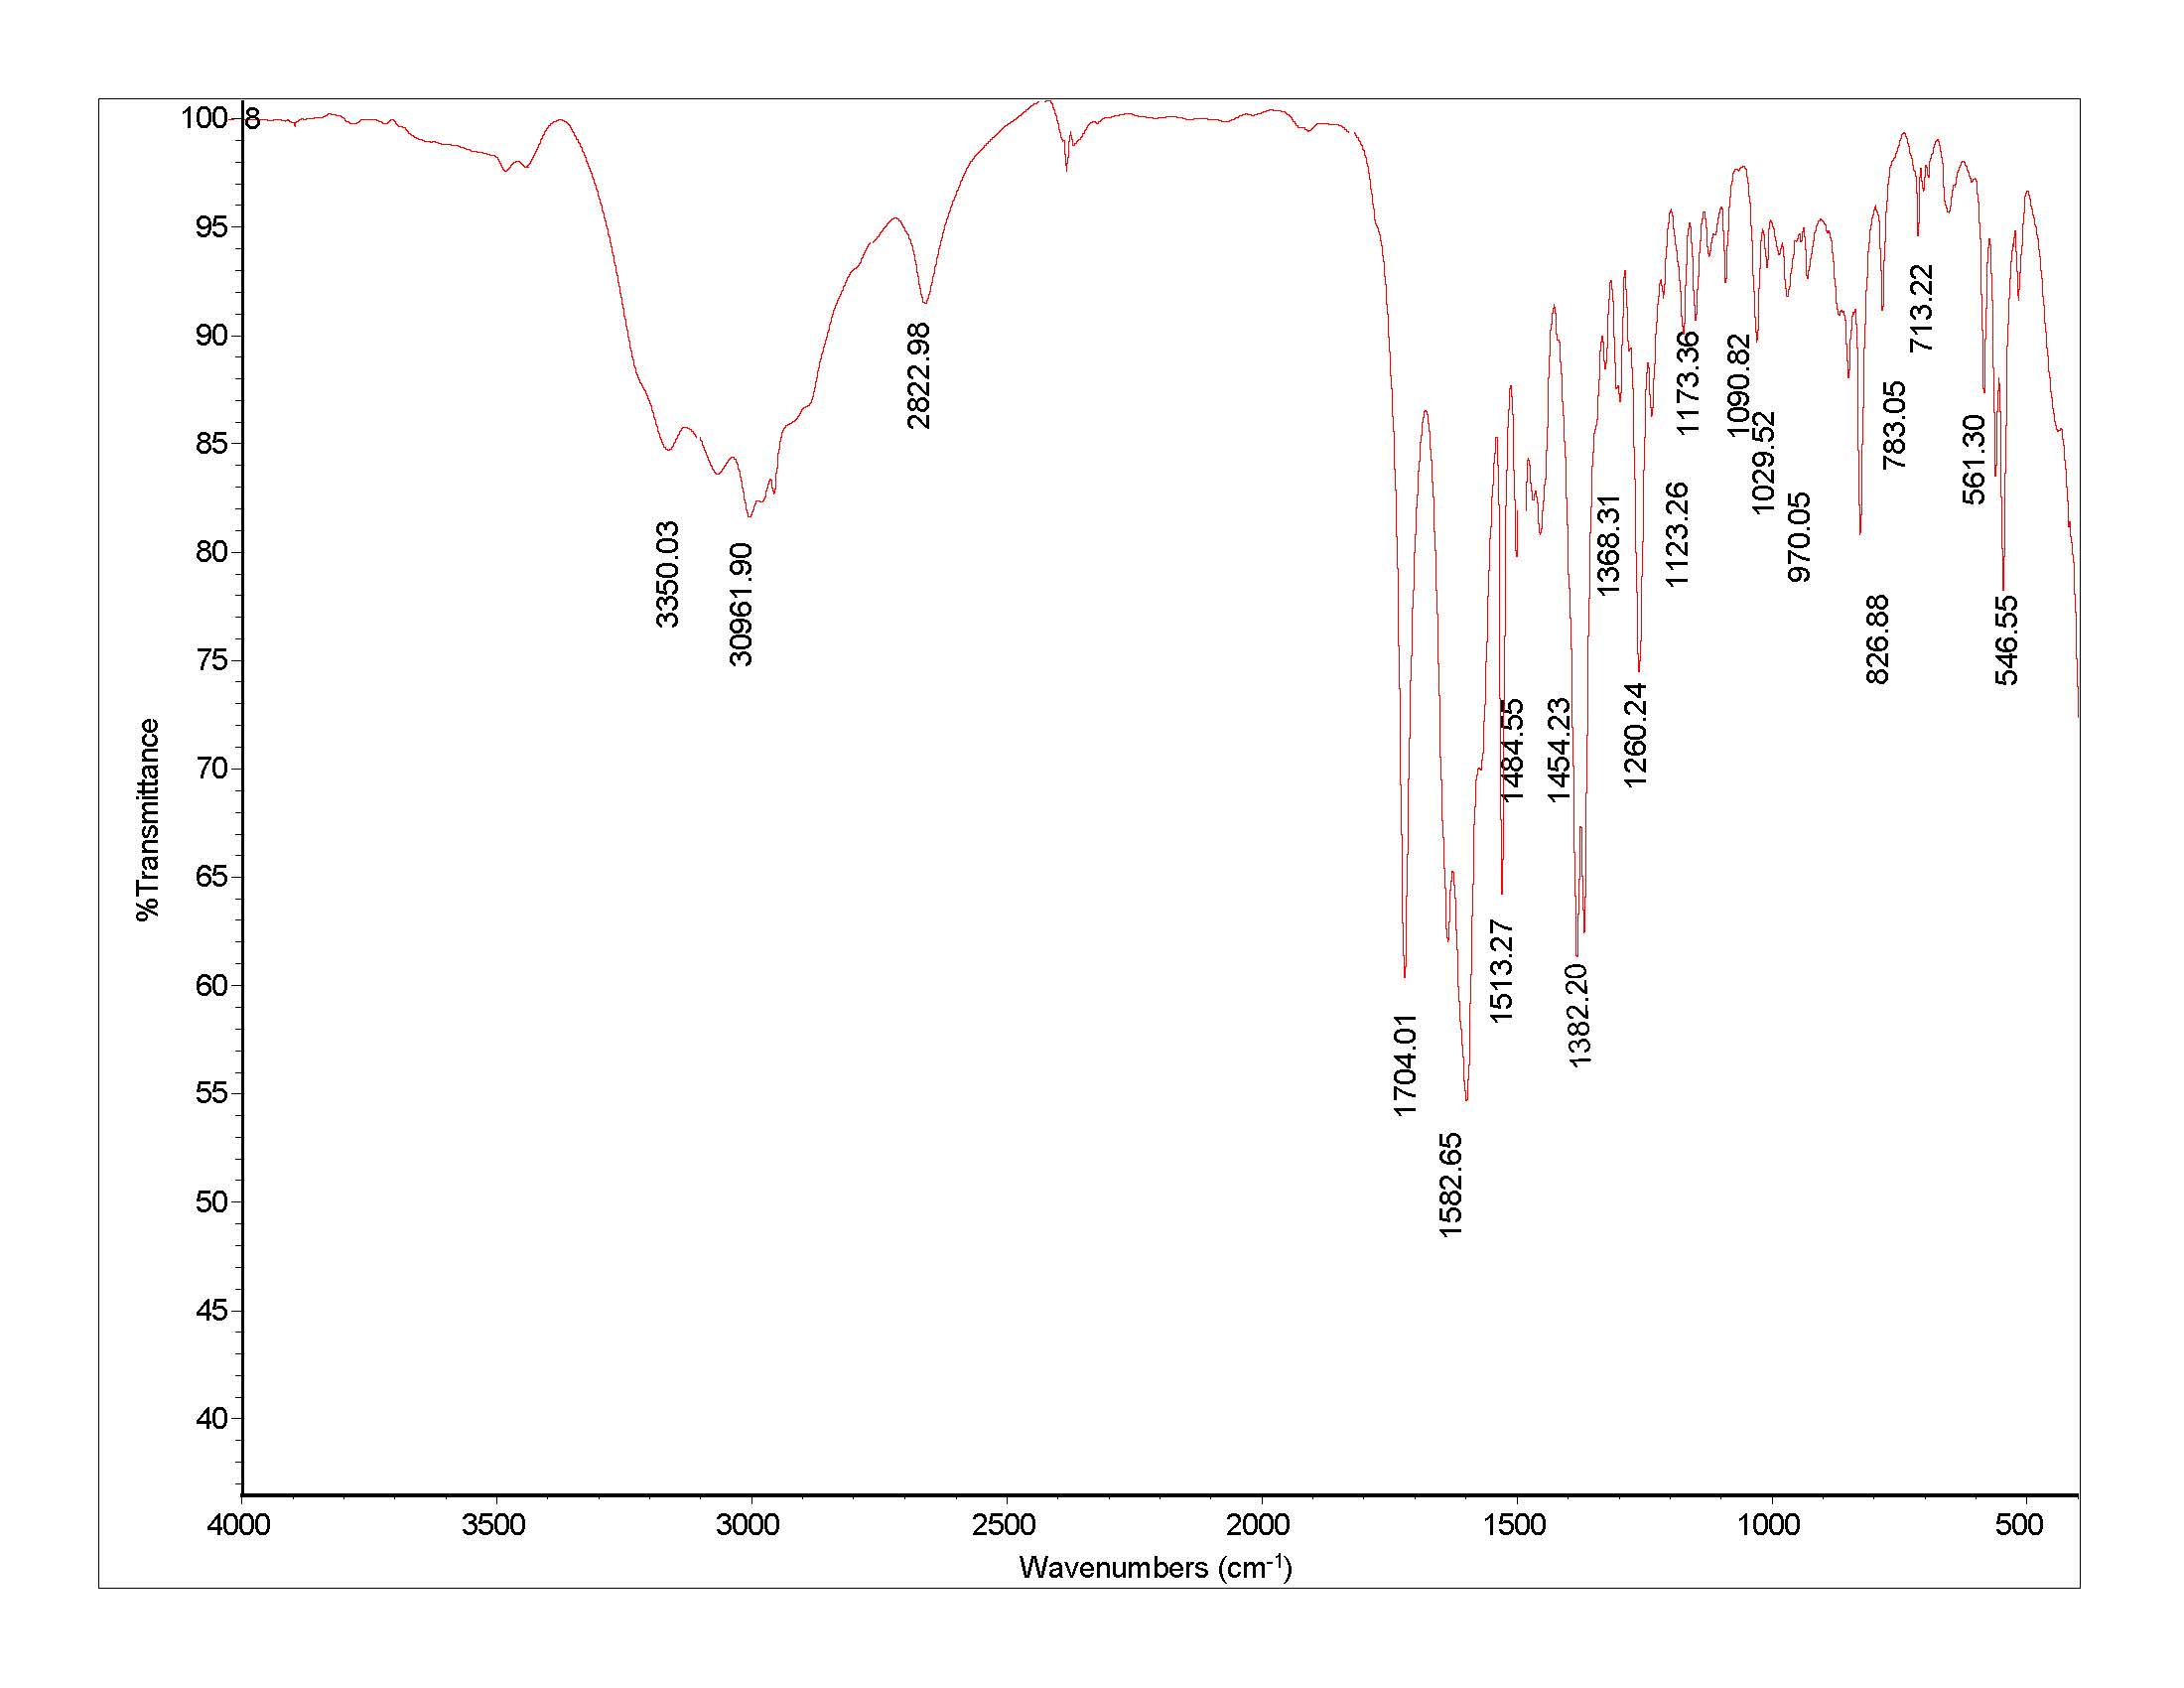
**

**Figure S14:** FT-IR spectrum of 5j.

**Figure S15:** 1H-NMR spectrum of 5j.

**
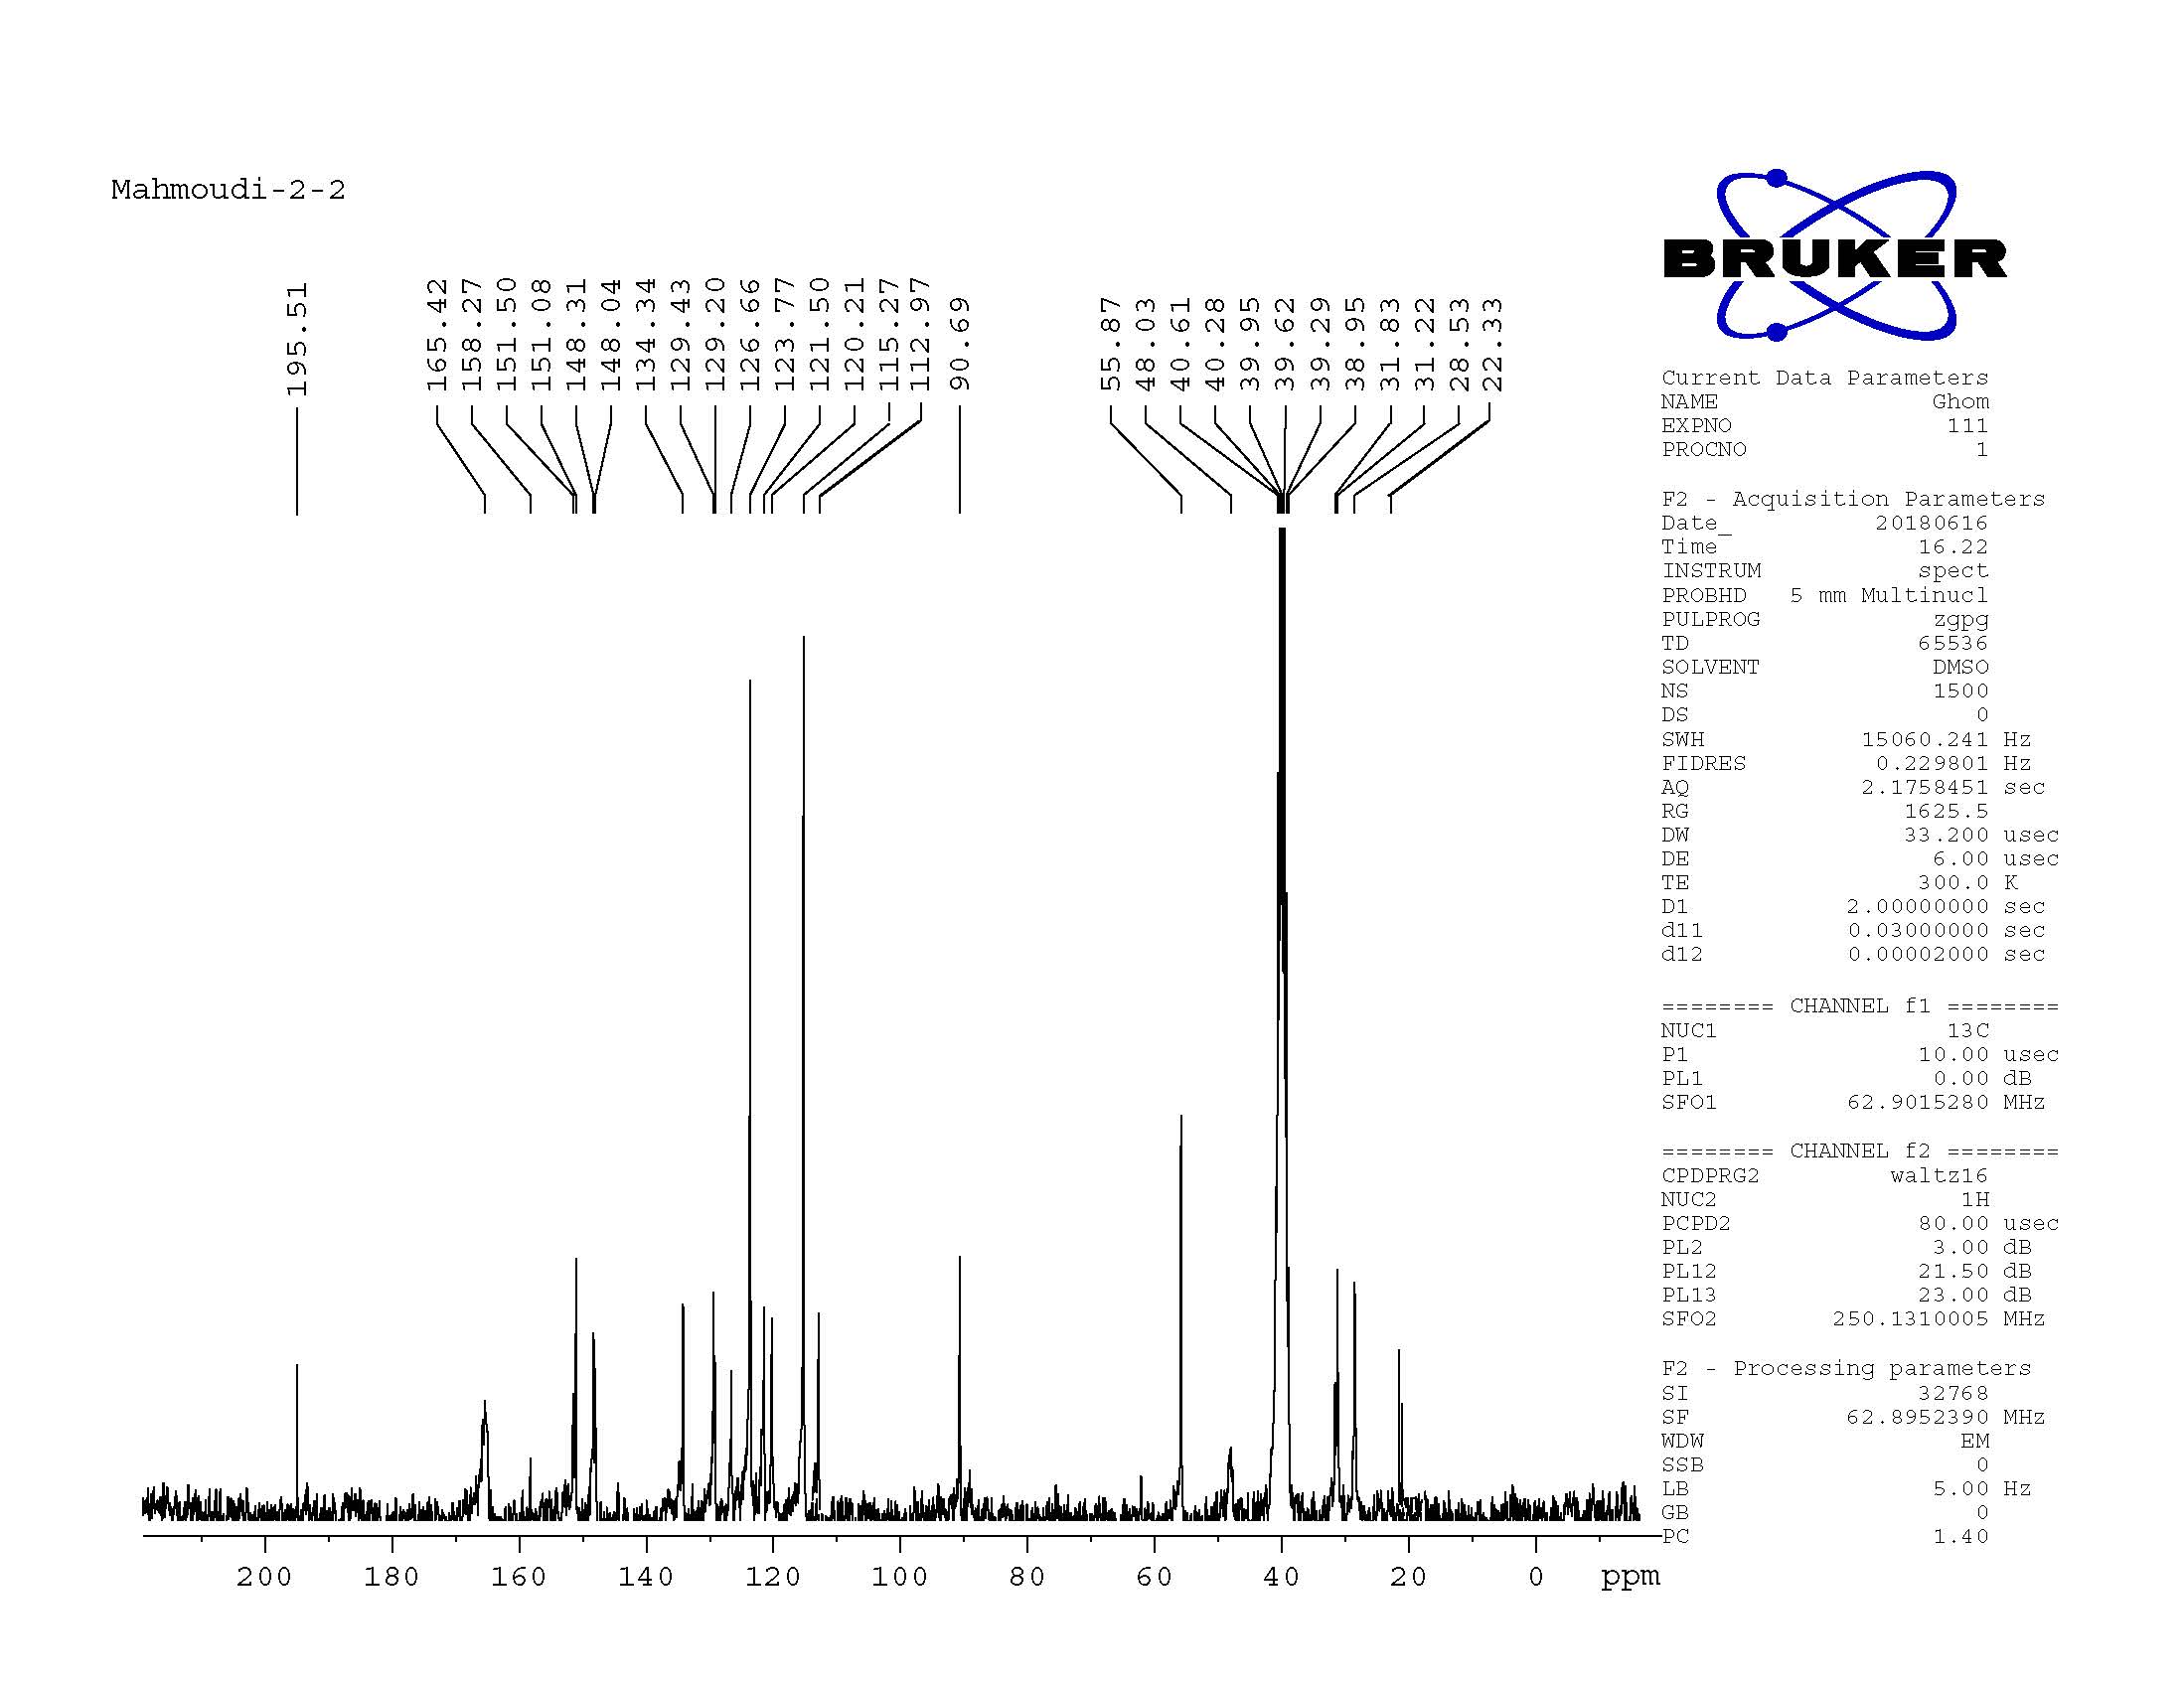
**

**Figure S16:** 13C-NMR spectrum of 5j.
